# Supplementary material for: A versatile iodo(iii)etherification of terminal ethynylsilanes using BF3–OiPr2and alkyl benzyl ethers
Source: Royal Society of Chemistry journal article supplement (doi:10.1039/d1ob00479d), 2021-01-01

## ***Supplementary Information***

### **A versatile iodo(III)etherification of terminal ethynylsilanes using BF<sub>3</sub>–O<sup>i</sup>Pr<sub>2</sub> and alkyl benzyl ether**

Takuya Matsumoto,<sup>a</sup> Hiroshi Hagiya,<sup>b</sup> Kanetsugu Kuribayashi,<sup>a</sup> Kazuhito Hioki,<sup>b</sup>  
Hikaru Fujita,<sup>a</sup> Masahito Ochiai<sup>c</sup> and Munetaka Kunishima<sup>\*a</sup>

<sup>a</sup> *Faculty of Pharmaceutical Sciences, Institute of Medical, Pharmaceutical, and Health Sciences, Kanazawa University, Kakuma-machi, Kanazawa 920-1192, Japan*

<sup>b</sup> *Faculty of Pharmaceutical Sciences, Kobe Gakuin University, 1-1-3 Minatojima, Chuo-ku, Kobe 650-8586, Japan*

<sup>c</sup> *Graduate School of Pharmaceutical Sciences, Tokushima University, 1-78 Shomachi, Tokushima 770-8505, Japan*

#### **Table of Contents**

|                                                                                                             |       |
|-------------------------------------------------------------------------------------------------------------|-------|
| 1. General                                                                                                  | S2    |
| 2. Preparation of boron trifluoride diisopropyl etherate (BF <sub>3</sub> –O <sup>i</sup> Pr <sub>2</sub> ) | S2    |
| 3. Procedure for the reactions in Table 1                                                                   | S2–3  |
| 4. Procedure for the reactions in Tables 2, 3, 4                                                            | S3    |
| 5. Characterization Data of λ <sup>3</sup> -iodonium salts                                                  | S4–6  |
| 6. References                                                                                               | S7    |
| 7. <sup>1</sup> H and <sup>13</sup> C NMR spectra                                                           | S8–25 |

## **General**

Unless otherwise noted, all reactions were performed under an atmosphere of dinitrogen. Solvents were dehydrated according to standard methods. Materials were obtained from common commercial suppliers, stored under dinitrogen, and used as received.  $^1\text{H}$  and  $^{13}\text{C}$  NMR spectra were recorded on a BRUKER DPX400 spectrometer ( $^1\text{H}$ : 400 MHz;  $^{13}\text{C}$ : 100.5 MHz) or a JEOL JNM-ECS400 ( $^1\text{H}$ : 400 MHz;  $^{13}\text{C}$ : 100.5 MHz) in  $\text{CDCl}_3$ . Chemical shift values ( $\delta$  ppm) for  $^1\text{H}$  and  $^{13}\text{C}$  are referenced to the resonances of the residual non-deuterated solvent as the internal standard ( $^1\text{H}$ :  $\text{CDCl}_3$ ,  $\delta$  7.26;  $^{13}\text{C}$ :  $\text{CDCl}_3$ ,  $\delta$  77.16). NMR data is reported as follows: s = singlet, d = doublet, t = triplet, q = quartet, m = multiplet; coupling constants in Hz; integration. Mass spectra were recorded on a JEOL D-300 mass spectrometer (FAB-MS) or a JMS-T100TD (ESI+). IR spectra were recorded on JEOL JIR-100 FT-IR or HORIBA FT-IR 720 spectrometer. GC data were obtained from a HITACHI 263-50 gas chromatograph (column: 10% SE-30 2 mm  $\times$  2 m). Melting points were measured on a Yanaco MP-J3 apparatus.

Iodosylbenzene was prepared from iodobenzene diacetate according to a reported procedure.<sup>1</sup> Benzyl isopropyl ether,<sup>2</sup> benzyl *tert*-butyl ether,<sup>2</sup> benzyl 2-phenylethyl ether,<sup>3</sup> and benzyl 3-phenylpropyl ether<sup>4</sup> were prepared according to reported procedures. Benzyl cyclohexylmethyl ether was prepared using a method similar to that of other alkyl benzyl ethers. The spectra of the thus obtained product were in good agreement with reported values.<sup>5</sup>

## **Preparation of boron trifluoride diisopropyl etherate ( $\text{BF}_3\text{--O}^i\text{Pr}_2$ )**

An ice-cooled solution of  $^i\text{Pr}_2\text{O}$  (7.00 g, 68.5 mmol) in  $\text{CH}_2\text{Cl}_2$  (30 mL) was aerated with  $\text{BF}_3$  gas generated from a mixture of  $\text{NaBF}_4$  (30.0 g, 273 mmol),  $\text{B}_2\text{O}_3$  (6.00 g, 86.2 mmol), and conc.  $\text{H}_2\text{SO}_4$  (30 mL) heated to 180  $^\circ\text{C}$ <sup>6</sup> for approximately 10 min. Removal of all volatiles under reduced pressure afforded  $\text{BF}_3\text{--O}^i\text{Pr}_2$  (7.90 g, 68% yield) as a colorless, hygroscopic, crystalline solid.  $^1\text{H}$  NMR (400 MHz,  $\text{CDCl}_3$ )  $\delta$  1.43 (d,  $J$  = 6.5 Hz, 6H), 4.47–4.61 (m, 1H).  $^{13}\text{C}$  NMR (100.5 MHz,  $\text{CDCl}_3$ )  $\delta$  21.2, 76.1.

## **Procedure for the reactions in Table 1**

A solution of the  $\text{BF}_3$ –ether complex (1.6–3.2 eq.) in  $\text{CH}_2\text{Cl}_2$  (3.5 mL) was added dropwise to an ice-cooled suspension of trialkylethynylsilane (0.50 mmol, 1.0 eq.) and iodosylbenzene (1.6–3.2 eq.) in  $\text{CH}_2\text{Cl}_2$  (3.5 mL). The reaction mixture was allowed to warm to room temperature. After the disappearance of trialkylethynylsilane was confirmed by GC, the reaction was quenched with a saturated aqueous solution of  $\text{NaBF}_4$  (2 mL). The organic phase was separated and the aqueous phase was extracted with  $\text{CH}_2\text{Cl}_2$  (3  $\times$  3 mL). The combined organic phases were washed with water (2 mL), filtered, and the solvent was removed under reduced pressure. Trituration of the residue with hexane afforded spectroscopically pure products. Recrystallization was performed for data collection.

The procedure was slightly modified for entry 6: The reaction was quenched with cold water. The organic phase was separated and the aqueous phase was extracted with  $\text{CH}_2\text{Cl}_2$  (3  $\times$  3 mL). The combined organic phase was washed with a cold saturated aqueous solution of  $\text{NaBr}$  (3  $\times$  2 mL), followed by a saturated aqueous solution of

NaBF<sub>4</sub> (3 × 2 mL), and water (2 mL). The organic phase was filtered, and all volatiles were removed under reduced pressure. Trituration of the residue with hexane afforded spectroscopically pure products. Recrystallization was performed for data collection.

#### **Procedure for the reactions in Tables 2, 3, 4**

*Method A:* A solution of the BF<sub>3</sub>–ether complex (1.5 mmol, 3.0 eq.) and the dialkylether (5.1 mmol, 10 eq.) in CH<sub>2</sub>Cl<sub>2</sub> (3.5 mL) was added dropwise to an ice-cooled suspension of ethynyltrimethylsilane (50 mg, 0.51 mmol, 1.0 eq.) and iodosylbenzene (336 mg, 1.5 mmol, 3.0 eq.) in CH<sub>2</sub>Cl<sub>2</sub> (3.5 mL). The reaction solution was allowed to warm to room temperature. After the disappearance of ethynyltrimethylsilane was confirmed by GC, the reaction was quenched with a saturated aqueous solution of NaBF<sub>4</sub> (2 mL). The organic phase was separated and the aqueous phase was extracted by CH<sub>2</sub>Cl<sub>2</sub> (3 × 3 mL). The combined organic phase was washed with water (2 mL), filtered, and the solvent was removed under reduced pressure. Trituration of the residue with hexane afforded the iodonium salts. In the cases where the product was a mixture, the yield was calculated based on the <sup>1</sup>H NMR integration values. Recrystallization was performed for data collection.

*Method B:* A solution of the BF<sub>3</sub>–ether complex (1.5 mmol, 3.0 eq.) and the dialkylether (5.1 mmol, 10 eq.) in CH<sub>2</sub>Cl<sub>2</sub> (3.5 mL) was heated to 50 °C under a dinitrogen atmosphere at ambient pressure until all CH<sub>2</sub>Cl<sub>2</sub> was evaporated. Another portion of CH<sub>2</sub>Cl<sub>2</sub> (3.5 mL) was added to the residue and removed again. More CH<sub>2</sub>Cl<sub>2</sub> (3.5 mL) was added to the residue, and this solution was added dropwise to an ice-cold mixture of ethynyltrimethylsilane (50 mg, 0.51 mmol, 1.0 eq.) and iodosylbenzene (336 mg, 1.5 mmol, 3.0 eq.) in CH<sub>2</sub>Cl<sub>2</sub> (3.5 mL). The subsequent operations were the same as in Method A.

### Characterization Data of $\lambda^3$ -iodanes

(*E*)-(2-Ethoxy-1-(trimethylsilyl)vinyl)(phenyl)iodonium tetrafluoroborate (**1a**)<sup>7</sup> and (*E*)-(2-Phenylethoxy-1-(trimethylsilyl)vinyl)(phenyl)iodonium tetrafluoroborate (**1b**)<sup>8</sup> are known compounds.

#### (*E*)-(2-Butoxy-1-(trimethylsilyl)vinyl)(phenyl)iodonium tetrafluoroborate (**1c**)

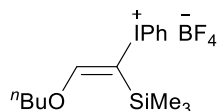

colorless crystalline solid (CH<sub>2</sub>Cl<sub>2</sub> / hexane); **mp** 118.5–119°C; <sup>1</sup>H NMR (400 MHz, CDCl<sub>3</sub>)  $\delta$  0.17 (s, 9H), 0.95 (t, *J* = 7.4 Hz, 3H), 1.36–1.46 (m, 2H), 1.67–1.74 (m, 2H), 4.28 (t, *J* = 6.5 Hz, 2H), 7.42–7.47 (m, 2H), 7.55–7.59 (m, 1H), 7.90–7.93 (m, 2H), 8.22 (s, 1H); <sup>13</sup>C NMR (100.5 MHz, CDCl<sub>3</sub>)  $\delta$  0.0, 13.6, 18.8, 31.7, 76.6, 94.4, 110.7, 132.0, 132.2, 133.8, 176.1; **IR** (KBr) 1577, 1083, 842 cm<sup>-1</sup>; **HRMS-FAB** (*m/z*) Calcd for C<sub>15</sub>H<sub>24</sub>OSi [(M-BF<sub>4</sub>)<sup>+</sup>] 375.0641, Found 375.0643; **Anal.** Calcd for C<sub>15</sub>H<sub>24</sub>BF<sub>4</sub>IOSi: C, 38.98; H, 5.23; I, 27.46. Found: C, 38.68; H, 5.26; I, 27.49.

#### (*E*)-(2-Isopropoxy-1-(trimethylsilyl)vinyl)(phenyl)iodonium tetrafluoroborate (**1d**)

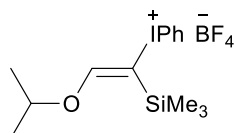

colorless crystalline solid (CH<sub>2</sub>Cl<sub>2</sub> / hexane); **mp** 154–155°C (decomp.); <sup>1</sup>H NMR (400 MHz, CDCl<sub>3</sub>)  $\delta$  0.17 (s, 9H), 1.36 (d, *J* = 6.2 Hz, 6H), 4.56–4.62 (m, 1H), 7.43–7.48 (m, 2H), 7.56–7.61 (m, 1H), 7.88–7.92 (m, 2H), 8.26 (s, 1H); <sup>13</sup>C NMR (100.5 MHz, CDCl<sub>3</sub>)  $\delta$  0.0, 22.5, 80.6, 94.5, 110.6, 132.0, 132.2, 133.7, 174.8; **IR** (KBr) 1577, 1083, 842 cm<sup>-1</sup>; **HRMS-FAB** (*m/z*) Calcd for C<sub>14</sub>H<sub>22</sub>OSi [(M-BF<sub>4</sub>)<sup>+</sup>] 361.0485, Found 361.0485; **Anal.** Calcd for C<sub>14</sub>H<sub>22</sub>BF<sub>4</sub>IOSi: C, 37.52; H, 4.95; I, 28.32. Found: C, 37.23; H, 4.93; I, 28.30.

#### (*E*)-(1-(*tert*-Butyldimethylsilyl)-2-ethoxyvinyl)(phenyl)iodonium tetrafluoroborate (**1e**)

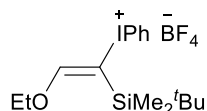

colorless crystalline solid (CH<sub>2</sub>Cl<sub>2</sub> / hexane); **mp** 164–165°C (decomp.); <sup>1</sup>H NMR (400 MHz, CDCl<sub>3</sub>)  $\delta$  0.19 (s, 6H), 0.80 (s, 9H), 1.37 (t, *J* = 7.1 Hz, 3H), 4.36 (q, *J* = 7.1 Hz, 2H), 7.45–7.49 (m, 2H), 7.59–7.62 (m, 1H), 7.91–7.93 (m, 2H), 8.38 (s, 1H); <sup>13</sup>C NMR (100.5 MHz, CDCl<sub>3</sub>)  $\delta$  -3.5, 15.3, 18.5, 26.6, 72.6, 93.3, 111.5, 132.0, 132.3, 134.3, 177.2; **IR** (KBr) 1573, 1216, 1051, 844, 825 cm<sup>-1</sup>; **HRMS-FAB** (*m/z*) Calcd for C<sub>16</sub>H<sub>26</sub>OSi [(M-BF<sub>4</sub>)<sup>+</sup>] 389.07976, Found 389.07916.

**Phenyl(4-phenoxyphenyl)iodonium tetrafluoroborate (3)**

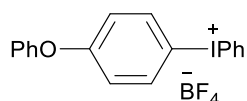

colorless crystalline solid ( $\text{CH}_2\text{Cl}_2$  /  $\text{Et}_2\text{O}$ ); **mp** 136–137°C;  $^1\text{H}$  NMR (400 MHz,  $\text{CDCl}_3$ )  $\delta$  6.96–7.00 (m, 2H), 7.02–7.06 (m, 2H), 7.21–7.26 (m, 1H), 7.38–7.43 (m, 2H), 7.43–7.48 (m, 2H), 7.58–7.63 (m, 1H), 7.95–7.98 (m, 2H), 7.99–8.03 (m, 2H);  $^{13}\text{C}$  NMR (100.5 MHz,  $\text{CDCl}_3$ )  $\delta$  102.0, 112.9, 120.6, 121.0, 125.6, 130.4, 132.5, 132.7, 134.9, 137.8, 154.4, 162.2; **HRMS-FAB** ( $m/z$ ) Calcd for  $\text{C}_{18}\text{H}_{14}\text{OI}$  [(M-BF<sub>4</sub>)<sup>+</sup>] 373.0089, Found 373.0045.

**(E)-(2-Methoxy-1-(trimethylsilyl)vinyl)(phenyl)iodonium tetrafluoroborate (1f)**

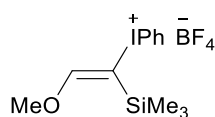

colorless crystalline solid ( $\text{CH}_2\text{Cl}_2$  / hexane); **mp** 131–133°C;  $^1\text{H}$  NMR (400 MHz,  $\text{CDCl}_3$ )  $\delta$  0.16 (s, 9H), 4.05 (s, 3H), 7.42–7.47 (m, 2H), 7.55–7.60 (m, 1H), 7.90–7.94 (m, 2H), 8.17 (s, 1H);  $^{13}\text{C}$  NMR (100.5 MHz,  $\text{CDCl}_3$ )  $\delta$  0.1, 63.2, 95.3, 110.6, 132.1, 132.3, 133.9, 177.0; **IR** (KBr) 1573, 1083, 844  $\text{cm}^{-1}$ ; **HRMS-FAB** ( $m/z$ ) Calcd for  $\text{C}_{12}\text{H}_{18}\text{OSiI}$  [(M-BF<sub>4</sub>)<sup>+</sup>] 333.0172, Found 333.0173.

**(E)-(2-Cyclohexylmethoxy-1-(trimethylsilyl)vinyl)(phenyl)iodonium tetrafluoroborate (1g)**

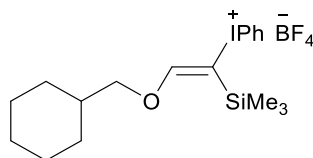

colorless crystalline solid ( $\text{CH}_2\text{Cl}_2$  / hexane); **mp** 134–136°C (decomp.);  $^1\text{H}$  NMR (400 MHz,  $\text{CDCl}_3$ )  $\delta$  0.19 (s, 9H), 0.97–1.07 (m, 2H), 1.13–1.32 (m, 3H), 1.66–1.79 (m, 6H), 4.09 (d,  $J$  = 6.0 Hz, 2H), 7.44–7.49 (m, 2H), 7.58–7.62 (m, 1H), 7.87–7.91 (m, 2H), 8.18 (s, 1H);  $^{13}\text{C}$  NMR (100.5 MHz,  $\text{CDCl}_3$ )  $\delta$  0.0, 25.6, 26.2, 29.2, 82.2, 94.2, 110.7, 132.0, 132.2, 133.7, 176.3; **IR** (KBr) 1577, 1083, 842  $\text{cm}^{-1}$ ; **HRMS-FAB** ( $m/z$ ) Calcd for  $\text{C}_{18}\text{H}_{28}\text{OSiI}$  [(M-BF<sub>4</sub>)<sup>+</sup>] 415.0954, Found 415.0965.

**(E)-(2-Benzyloxy-1-(trimethylsilyl)vinyl)(phenyl)iodonium tetrafluoroborate (1h)**

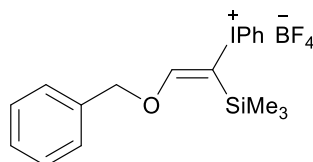

orange oil ( $\text{CH}_2\text{Cl}_2$  / hexane);  $^1\text{H}$  NMR (400 MHz,  $\text{CDCl}_3$ )  $\delta$  0.12 (s, 9H), 5.27 (s, 2H), 7.31–7.41 (m, 7H), 7.51 (t,  $J$  = 7.4 Hz, 1H), 7.85 (d,  $J$  = 7.5 Hz, 2H), 8.27 (s, 1H);  $^{13}\text{C}$  NMR (100.5 MHz,  $\text{CDCl}_3$ )  $\delta$  0.0, 77.6, 95.9, 110.8, 128.4, 128.8, 128.9, 131.9, 132.1, 133.8, 135.4, 175.3; **IR** (neat) 1571, 1066, 848  $\text{cm}^{-1}$ ; **HRMS-FAB**

(*m/z*) Calcd for C<sub>18</sub>H<sub>22</sub>OSi [(M-BF<sub>4</sub>)<sup>+</sup>] 409.0485, Found 409.0499.

**(*E*)-(2-(3-Phenylpropoxy)-1-(trimethylsilyl)vinyl)(phenyl)iodonium tetrafluoroborate (1i)**

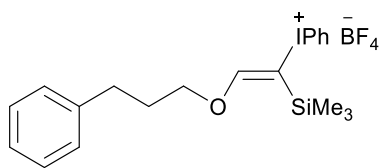

orange oil (CH<sub>2</sub>Cl<sub>2</sub> / hexane); <sup>1</sup>H NMR (400 MHz, CDCl<sub>3</sub>) δ 0.20 (s, 9*H*), 1.99–2.06 (m, 2*H*), 2.71 (t, *J* = 7.8 Hz, 2*H*), 4.30 (t, *J* = 6.4 Hz, 2*H*), 7.16–7.21 (m, 3*H*), 7.26–7.31 (m, 2*H*), 7.39–7.44 (m, 2*H*), 7.51–7.56 (m, 1*H*), 7.90–7.94 (m, 2*H*), 8.23 (s, 1*H*); <sup>13</sup>C NMR (100.5 MHz, CDCl<sub>3</sub>) δ 0.1, 31.5, 31.8, 75.8, 94.6, 110.9, 126.2, 128.5, 128.6, 132.0, 132.2, 133.9, 141.0, 175.8; **HRMS-FAB** (*m/z*) Calcd for C<sub>20</sub>H<sub>26</sub>OSi [(M-BF<sub>4</sub>)<sup>+</sup>] 437.0798, Found 437.0772.

## **References**

- (1) H. Shalzman and J. G. Sharefskin, *Org. Synth.*, 1963, **43**, 60.
- (2) N. Yasukawa, T. Kanie, M. Kuwata, Y. Monguchi, H. Sajiki and Y. Sawama, *Chem. Eur. J.*, 2017, **23**, 10974–10977.
- (3) G. Urgoitia, R. SanMartin, M. T. Herrero and E. Domínguez, *Adv. Synth. Catal.*, 2016, **358**, 3307–3312.
- (4) T. Kurita, K. Hattori, S. Seki, T. Mizumoto, F. Aoki, Y. Yamada, K. Ikawa, T. Maegawa, Y. Monguchi and H. Sajiki, *Chem. Eur. J.*, 2008, **14**, 664–673.
- (5) A. Gellert, N. Kahlcke, M. Feurer and S. Roth, *Chem. Eur. J.*, 2011, **17**, 12203–12209.
- (6) W. Kwasnik, *Handb. Prep. Inorg. Chem.*, 1963, 150–271.
- (7) M. Ochiai, M. Kunishima, K. Fuji, M. Shiro and Y. Nagao, *J. Chem. Soc., Chem. Commun.*, 1988, 1076–1077.
- (8) K. Miyamoto, T. Okubo, M. Hirobe, M. Kunishima and M. Ochiai, *Tetrahedron*, 2010, **66**, 5819–5826.

$^1\text{H}$  NMR;  $\text{BF}_3\text{-O}^i\text{Pr}_2$  ( $\text{CDCl}_3$ )

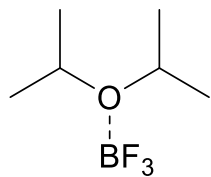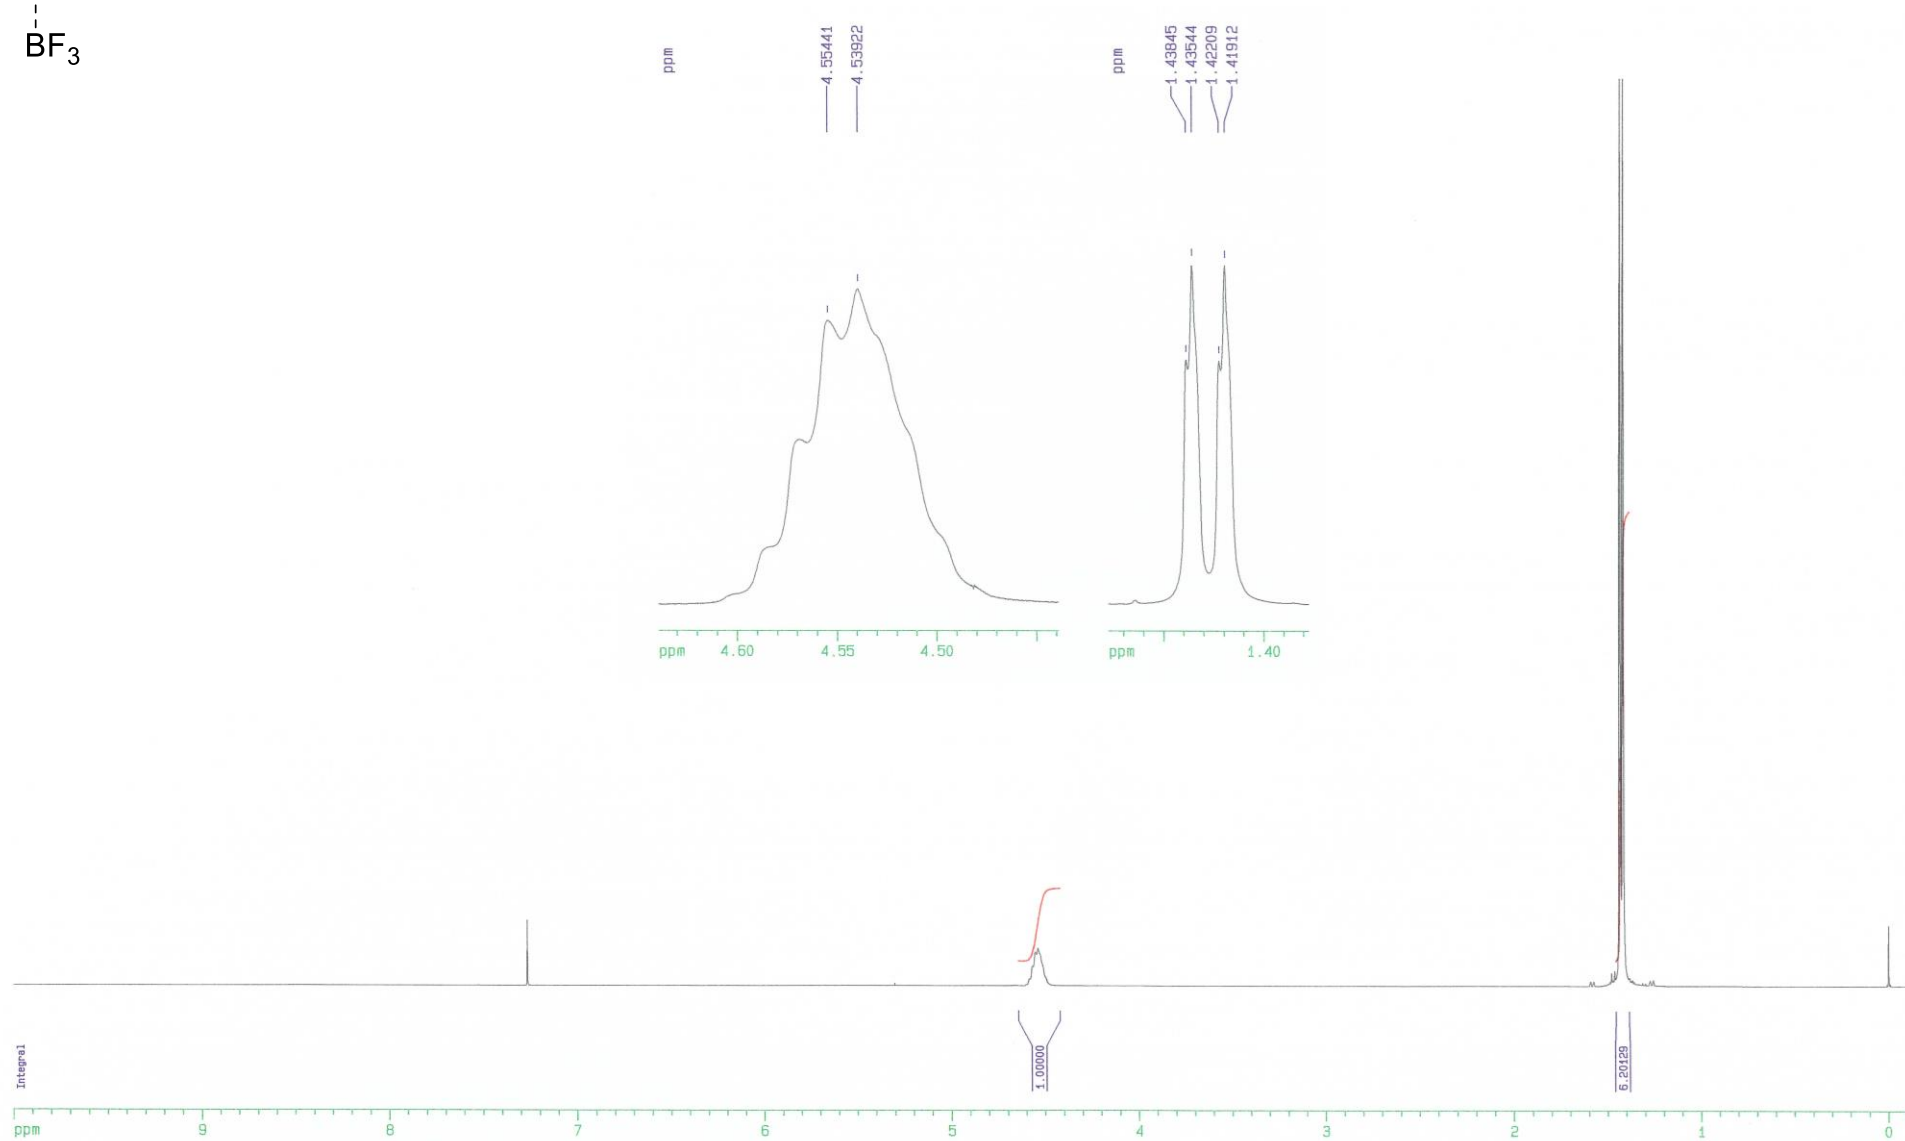

$^{13}\text{C}$  NMR;  $\text{BF}_3\text{-O}^i\text{Pr}_2$  ( $\text{CDCl}_3$ )

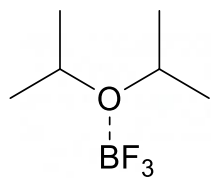

77.3445  
77.0266  
76.7092  
76.1369  
76.1065  
76.0381

21.2081  
21.1867

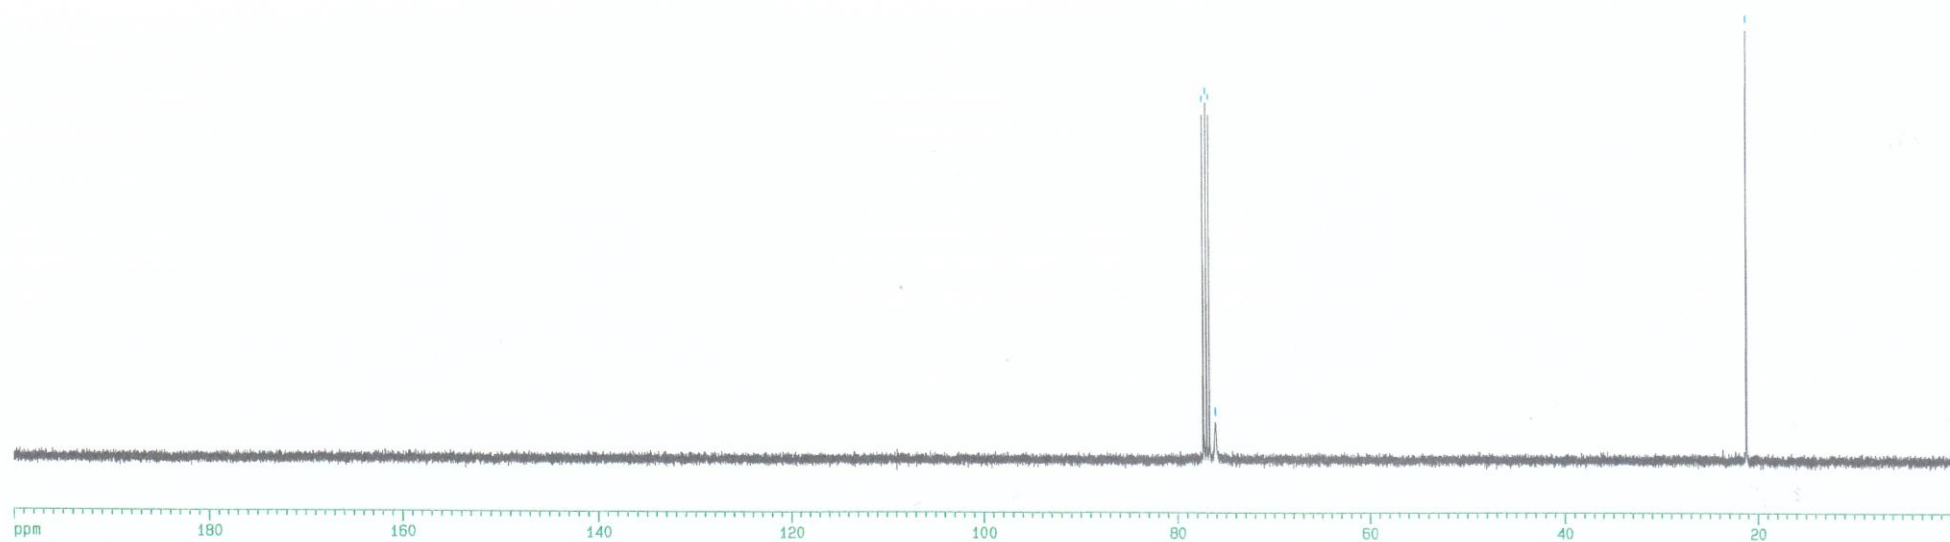

$^1\text{H}$  NMR; **1c** ( $\text{CDCl}_3$ )

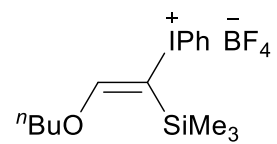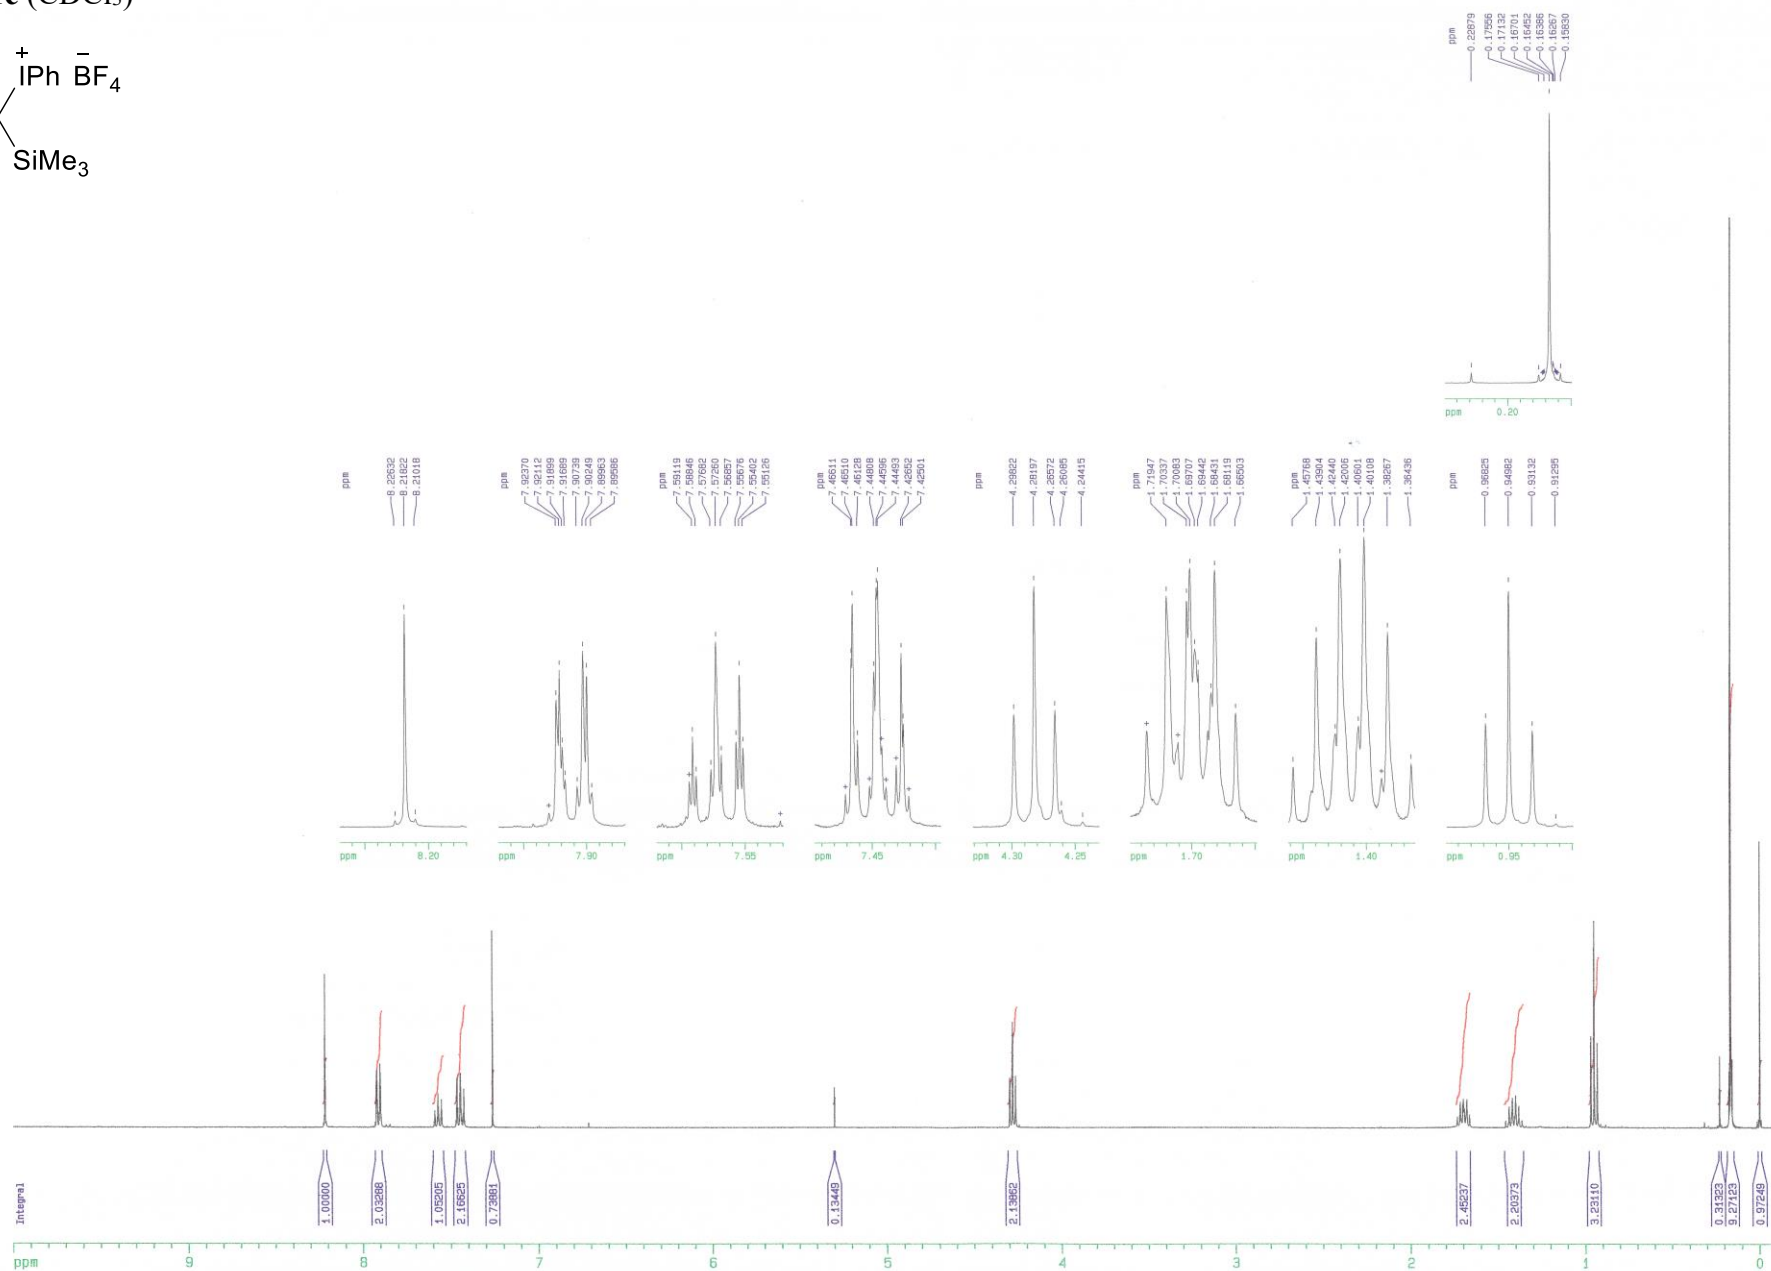

$^{13}\text{C}$  NMR: **1c** ( $\text{CDCl}_3$ )

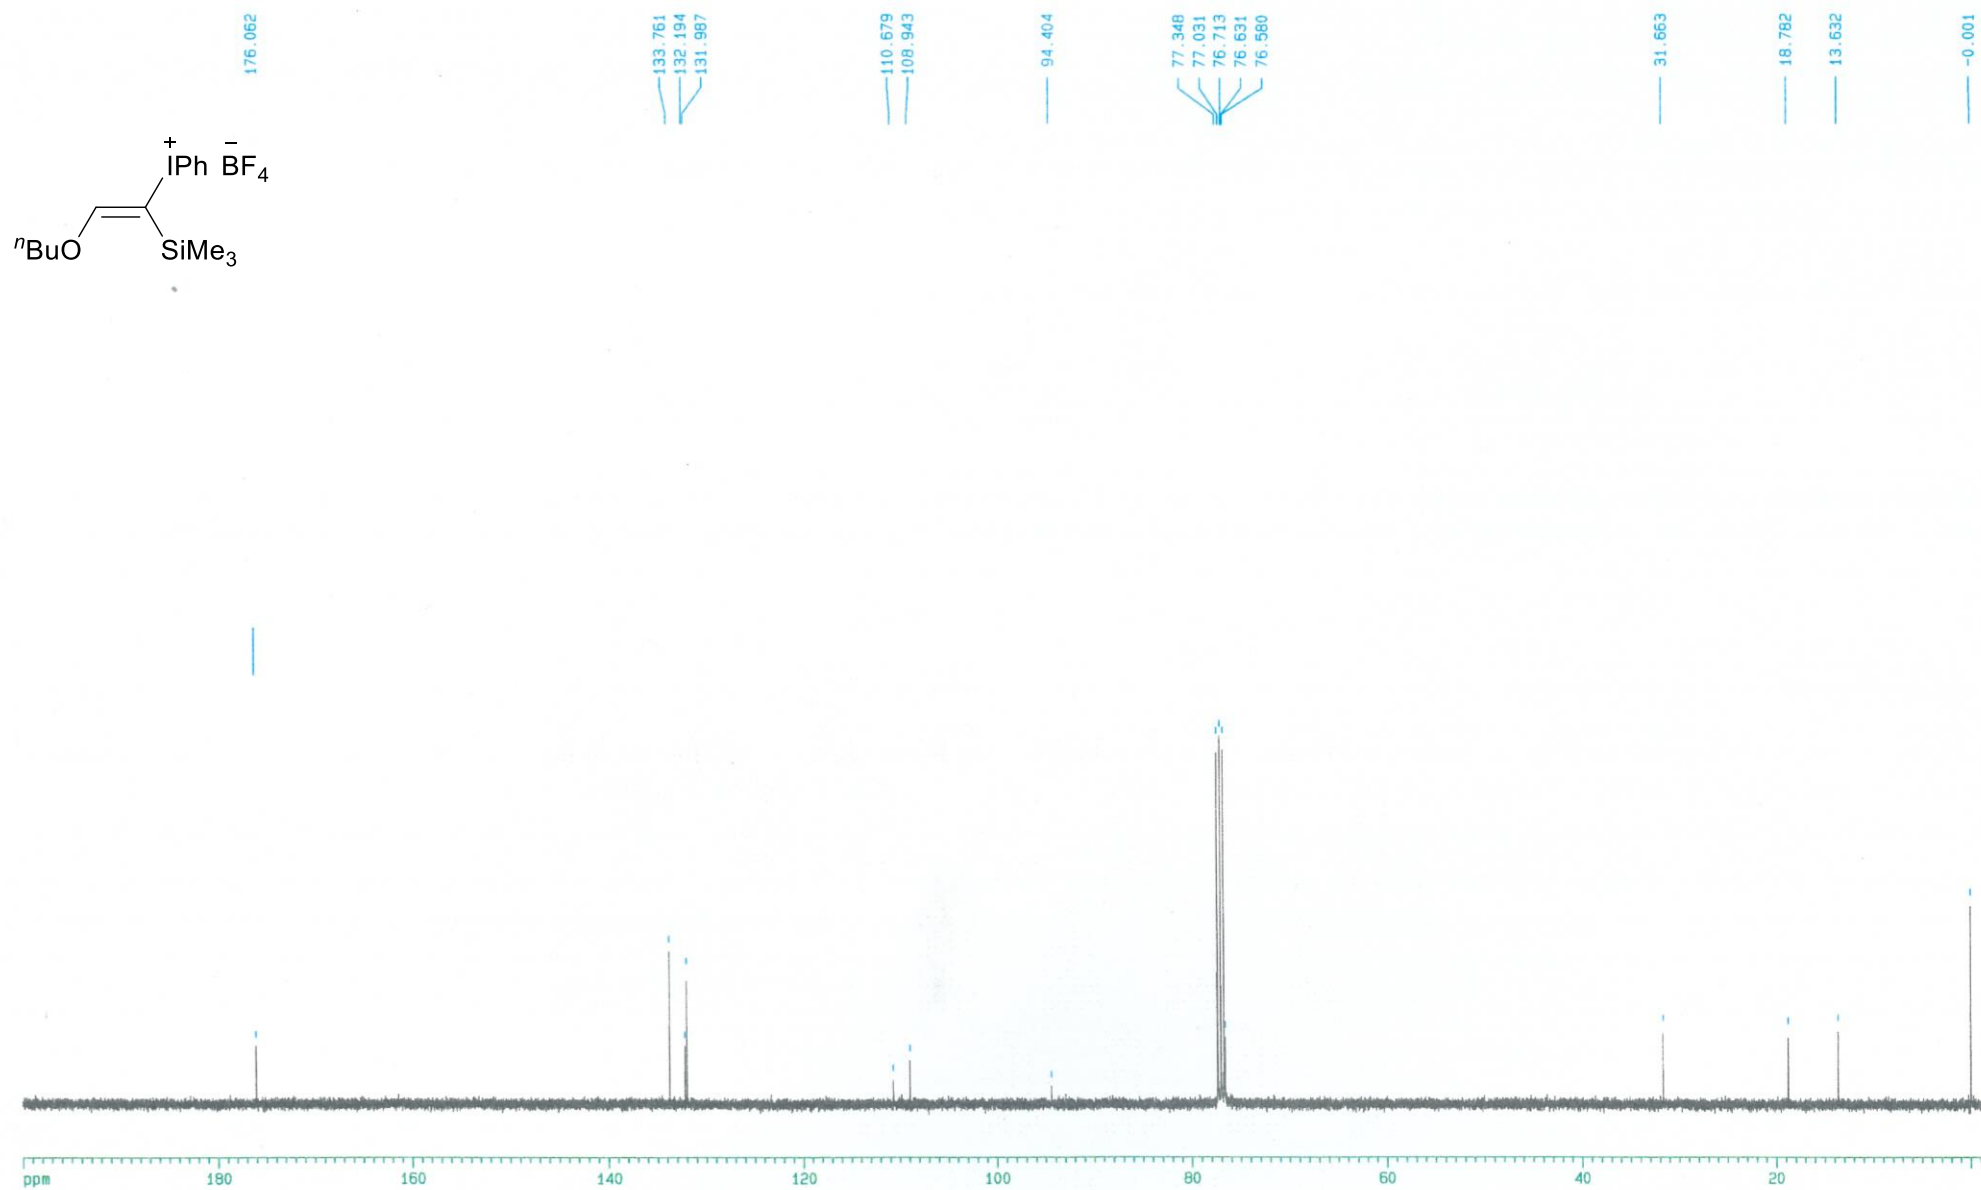

$^1\text{H}$  NMR: **1d** ( $\text{CDCl}_3$ )

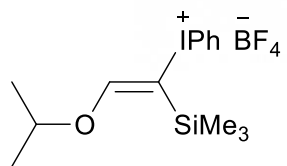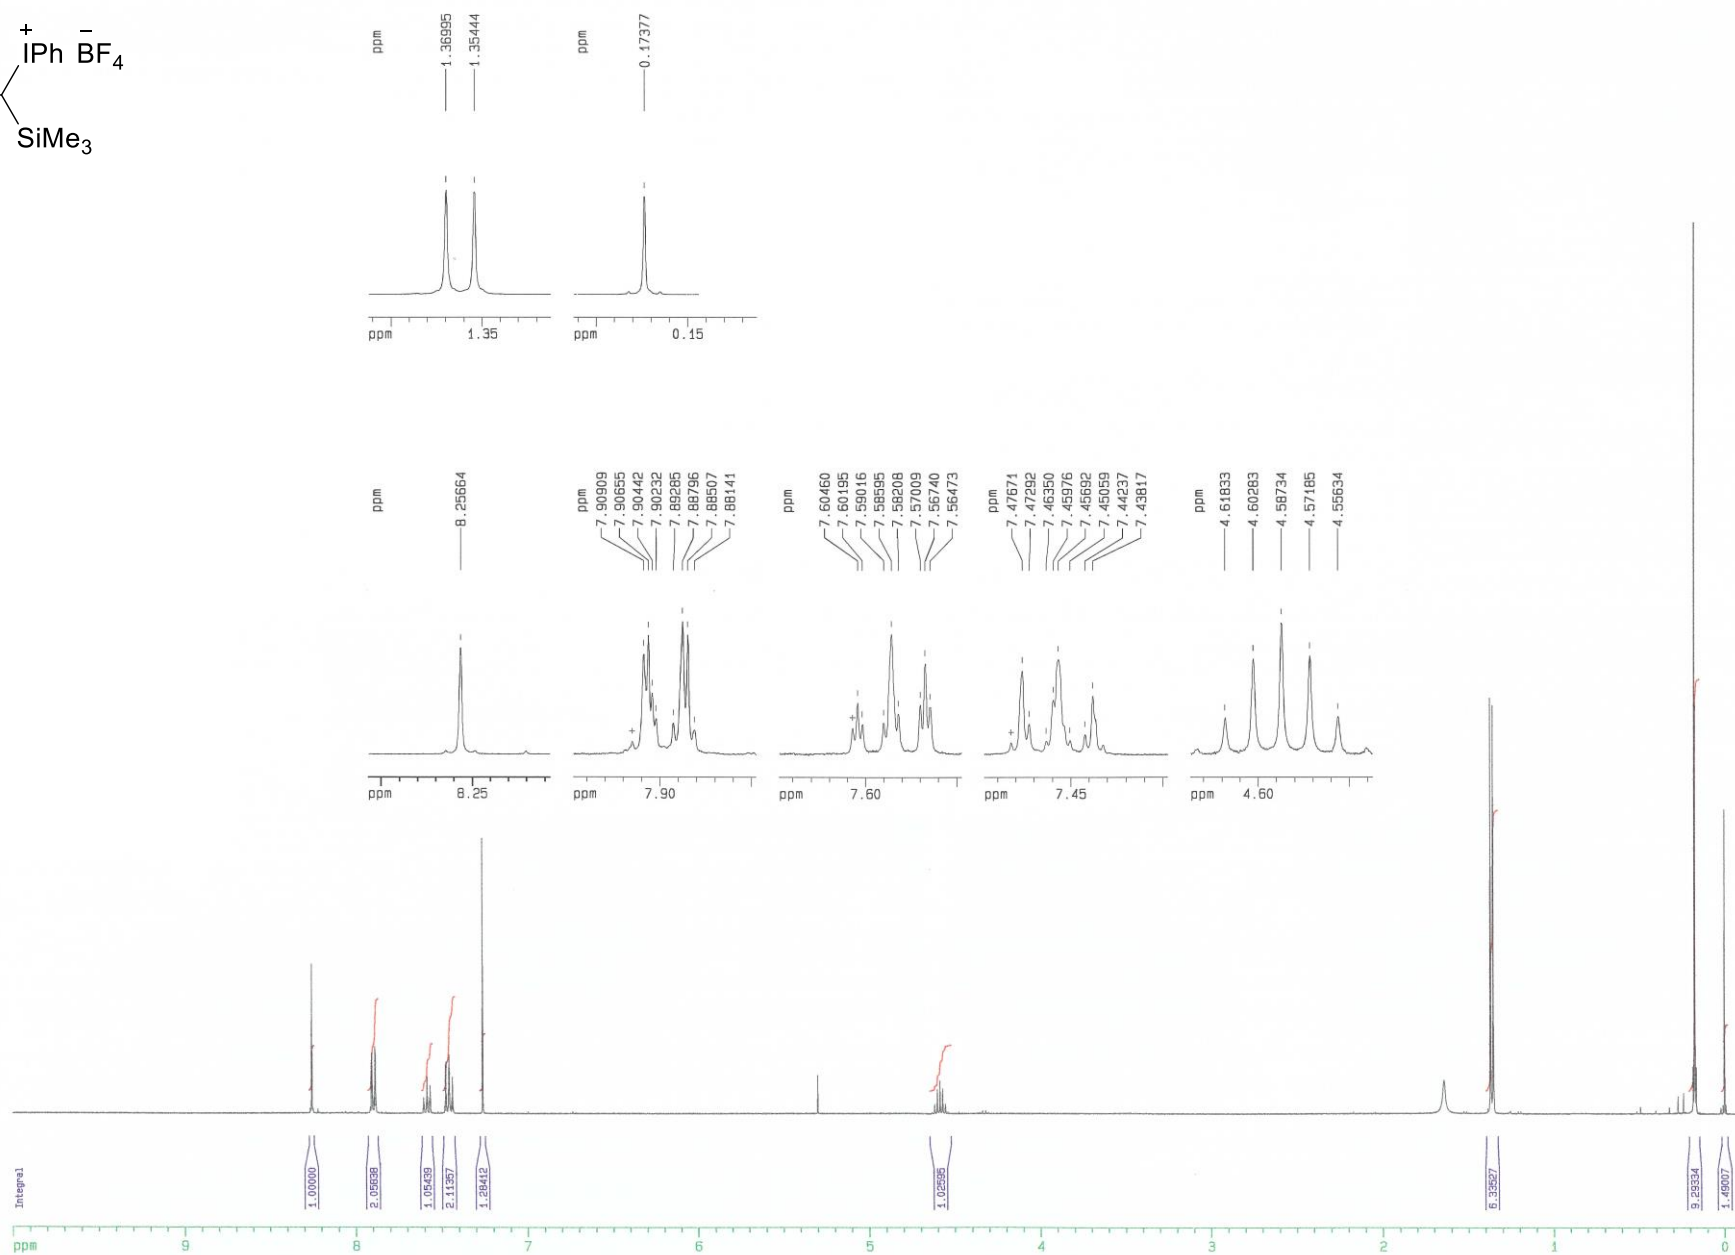

$^{13}\text{C}$  NMR: **1d** ( $\text{CDCl}_3$ )

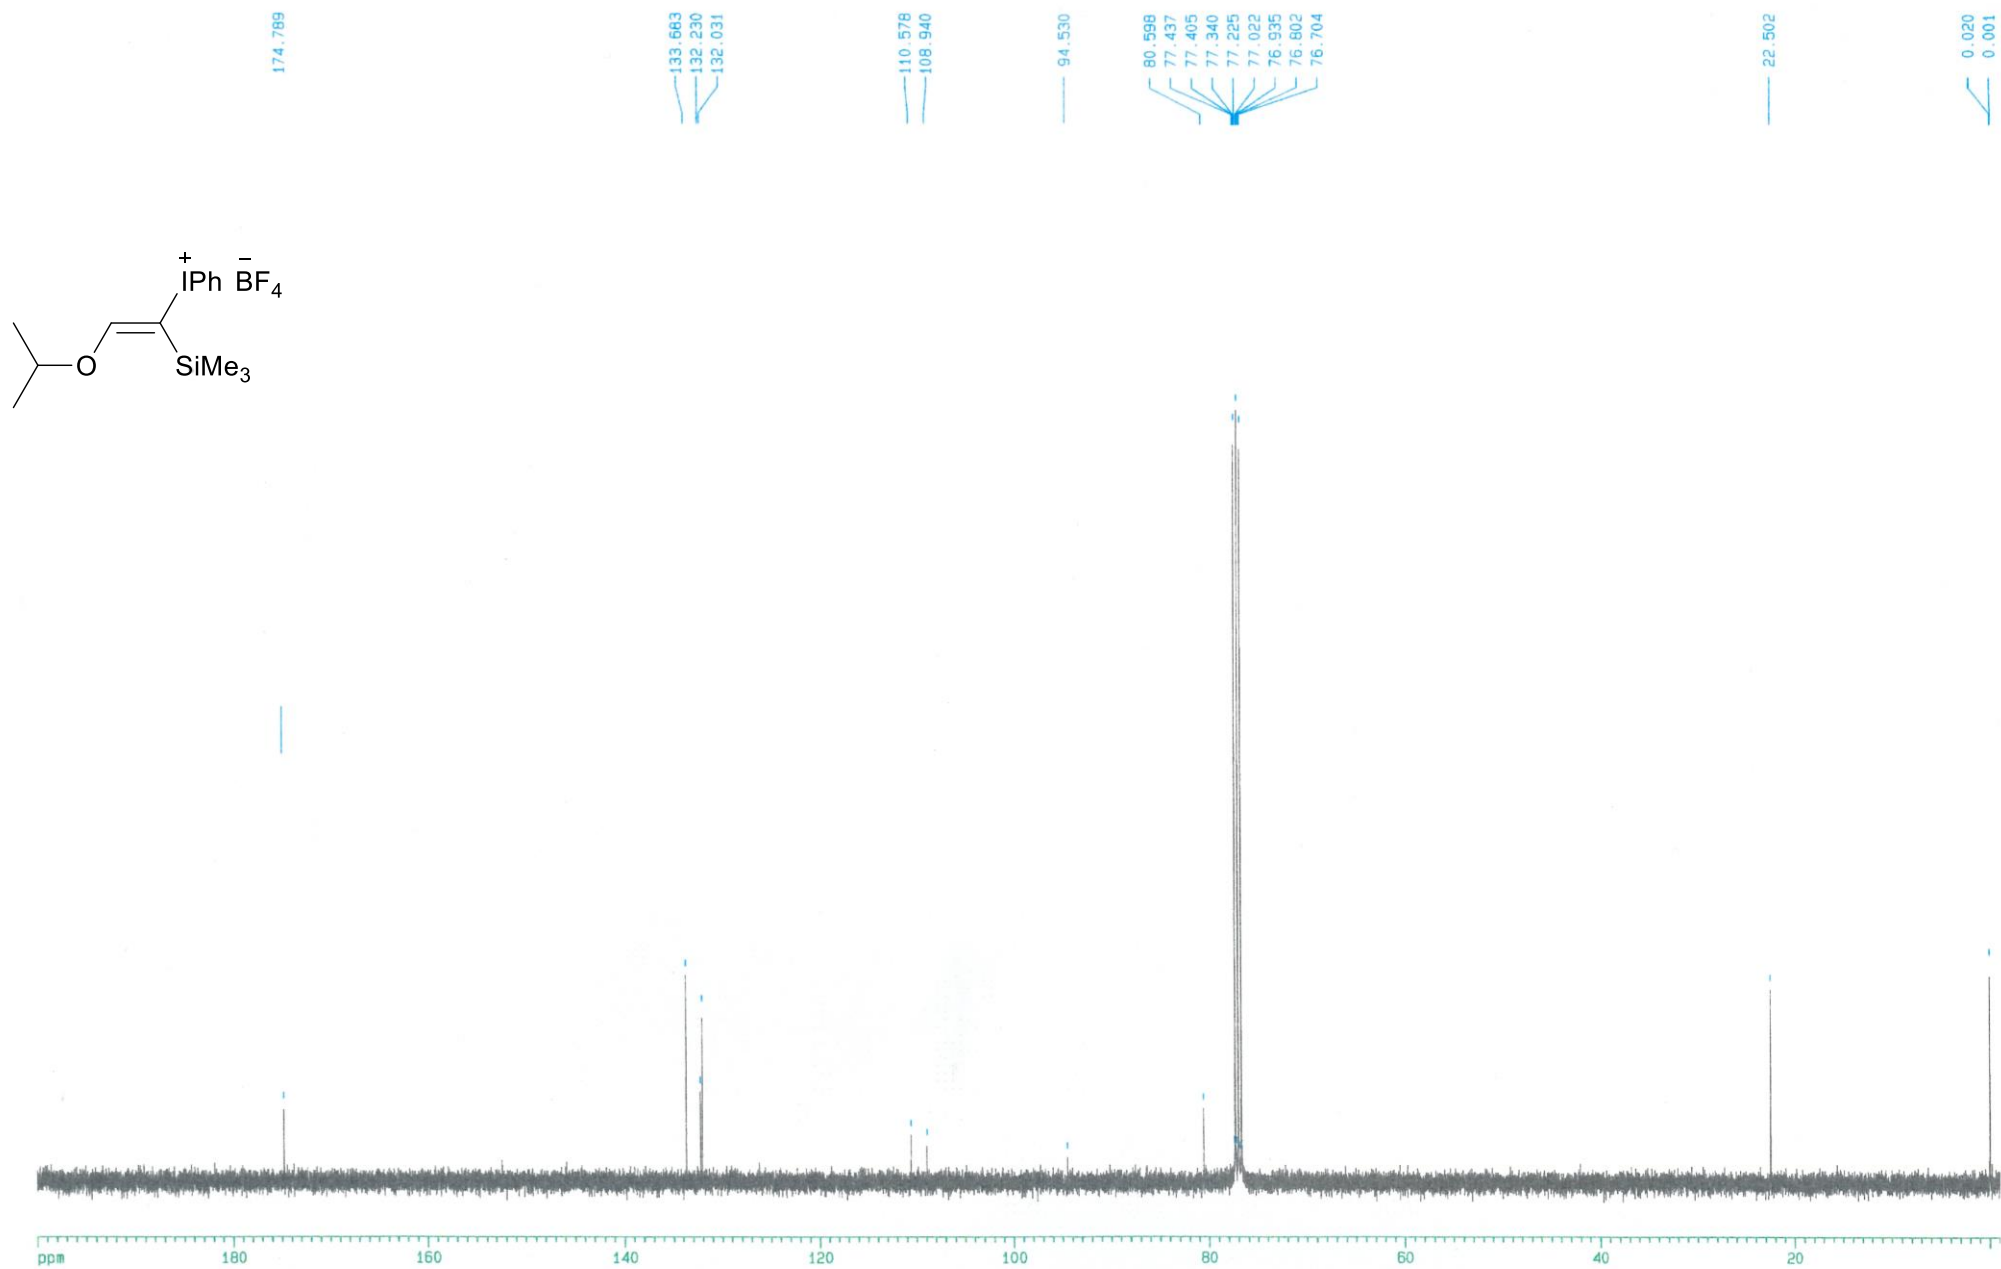

$^1\text{H}$  NMR: **1e** ( $\text{CDCl}_3$ )

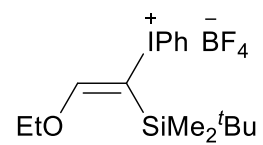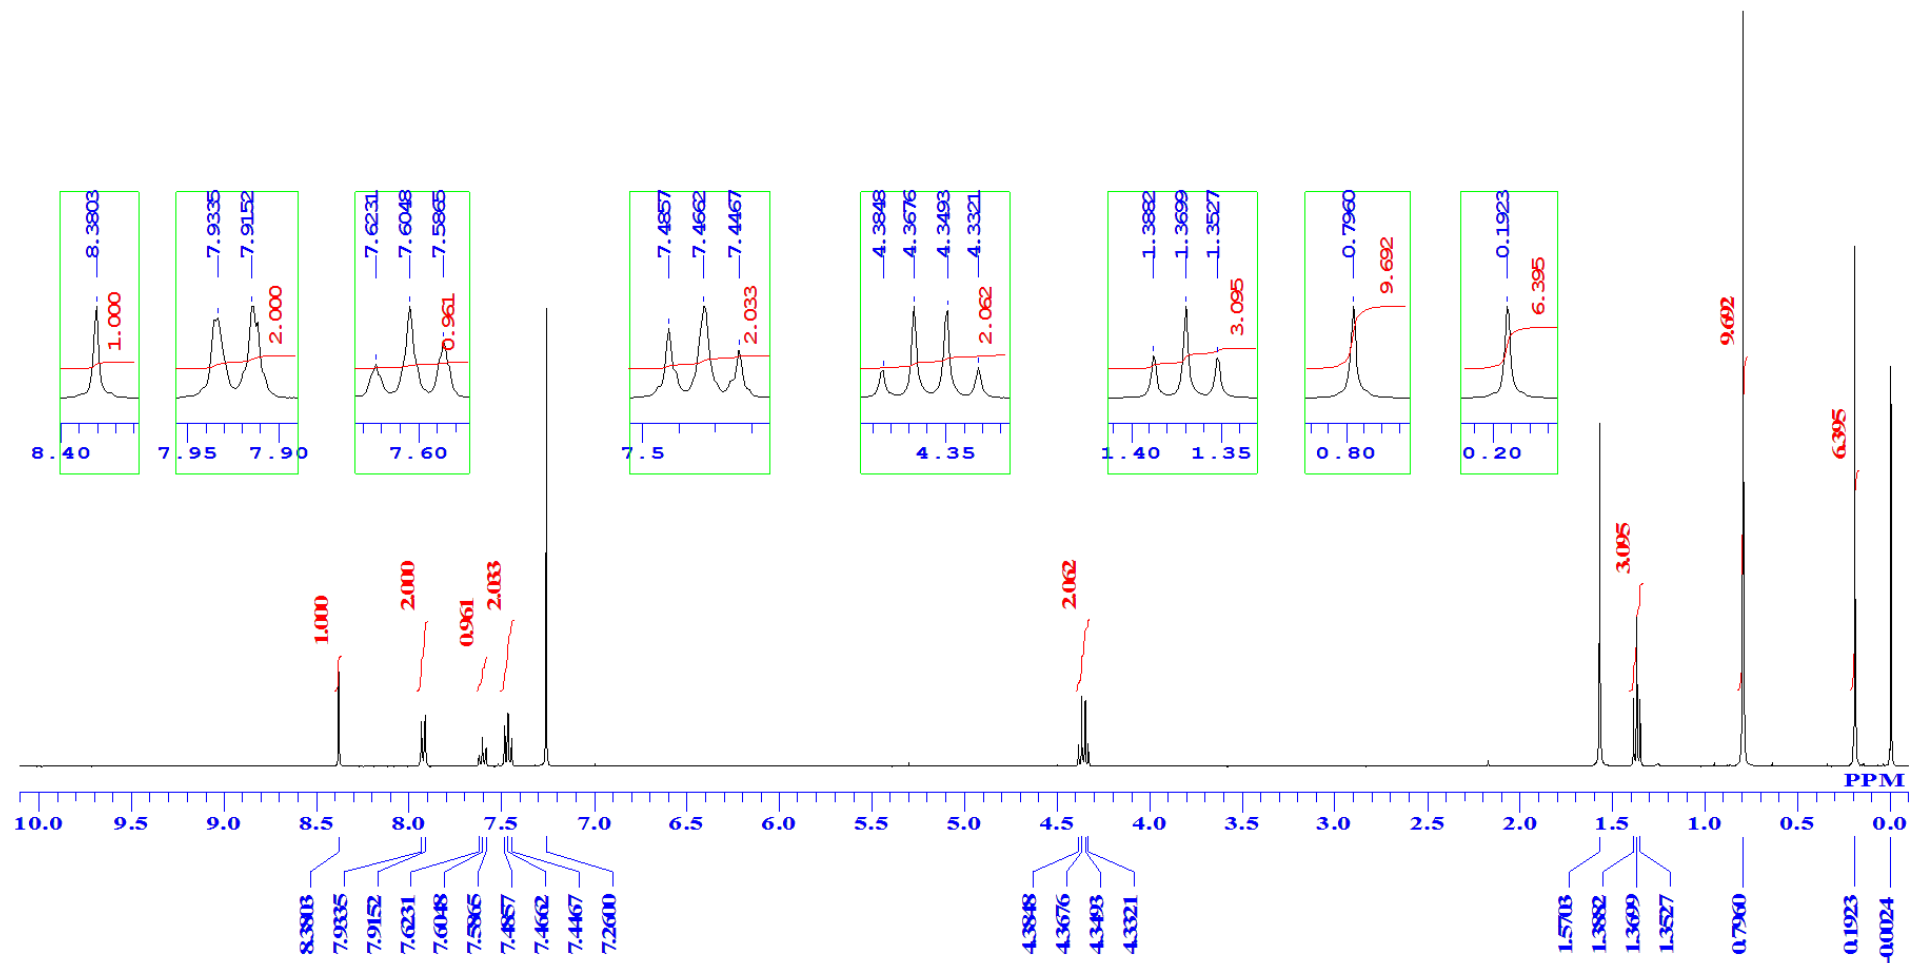

$^{13}\text{C}$  NMR: **1e** ( $\text{CDCl}_3$ )

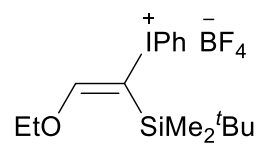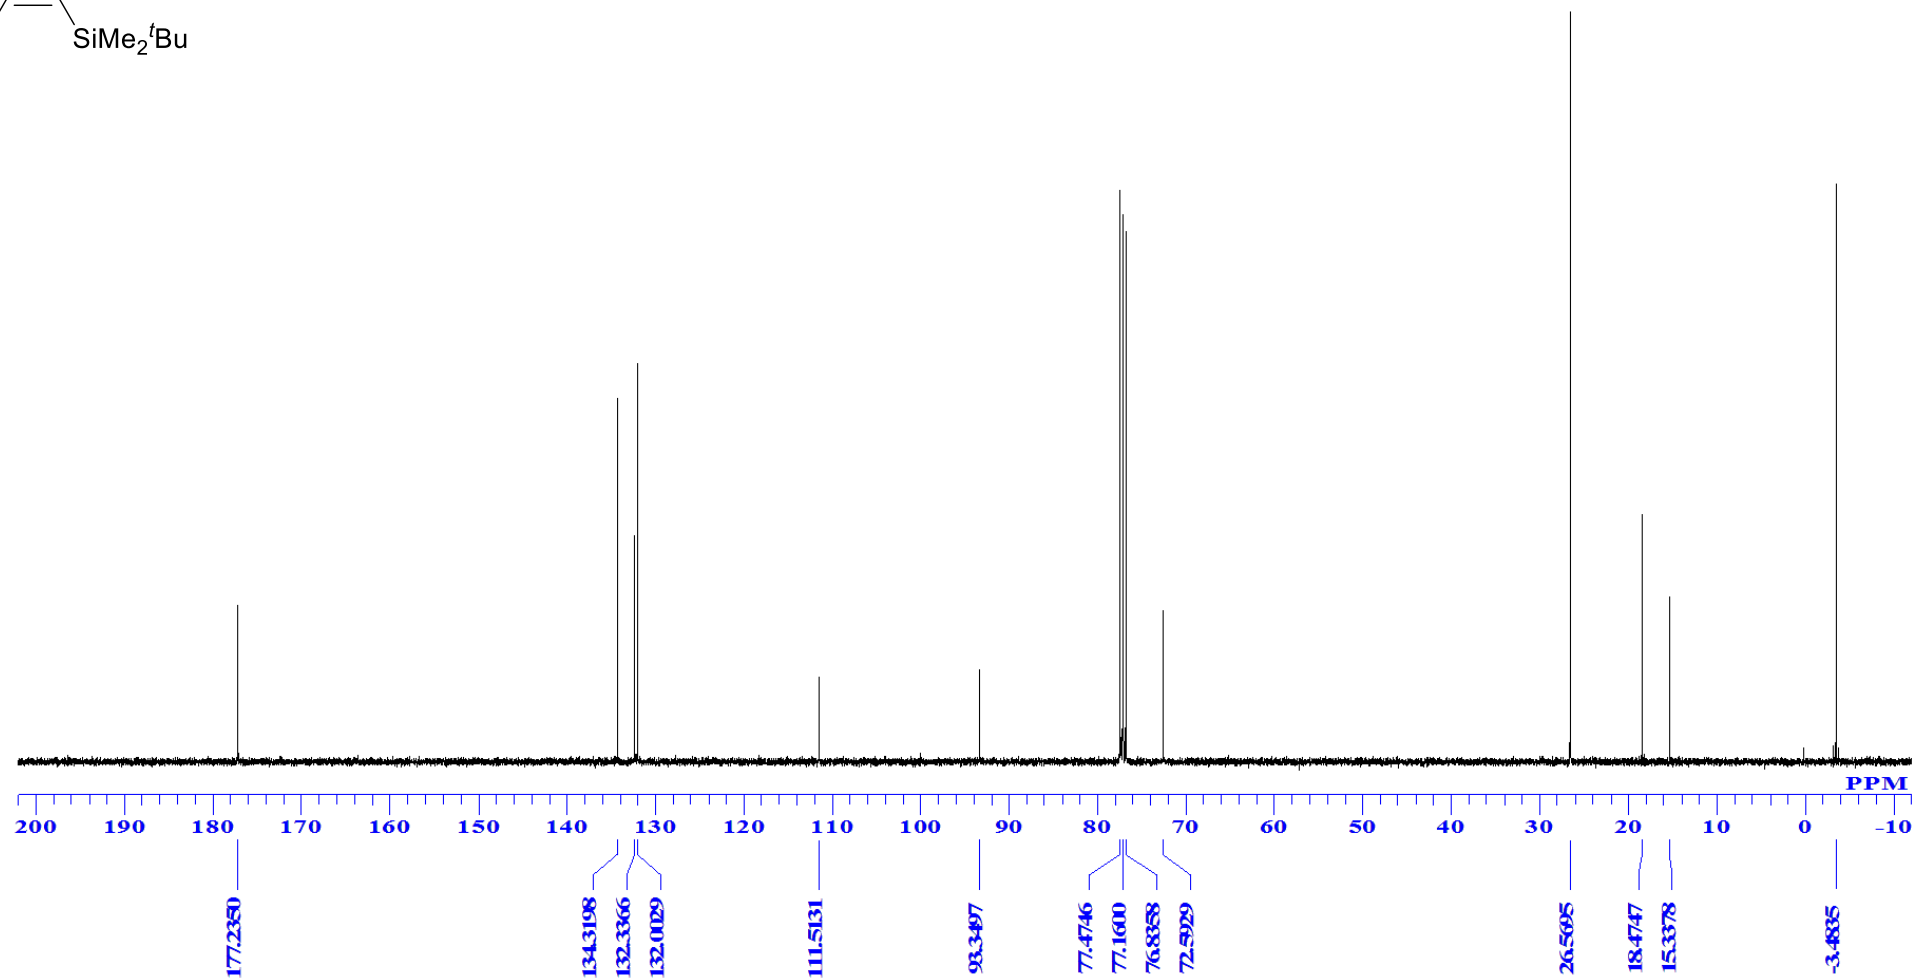

$^1\text{H}$  NMR: **3** ( $\text{CDCl}_3$ )

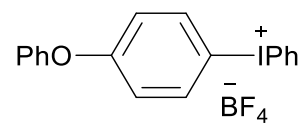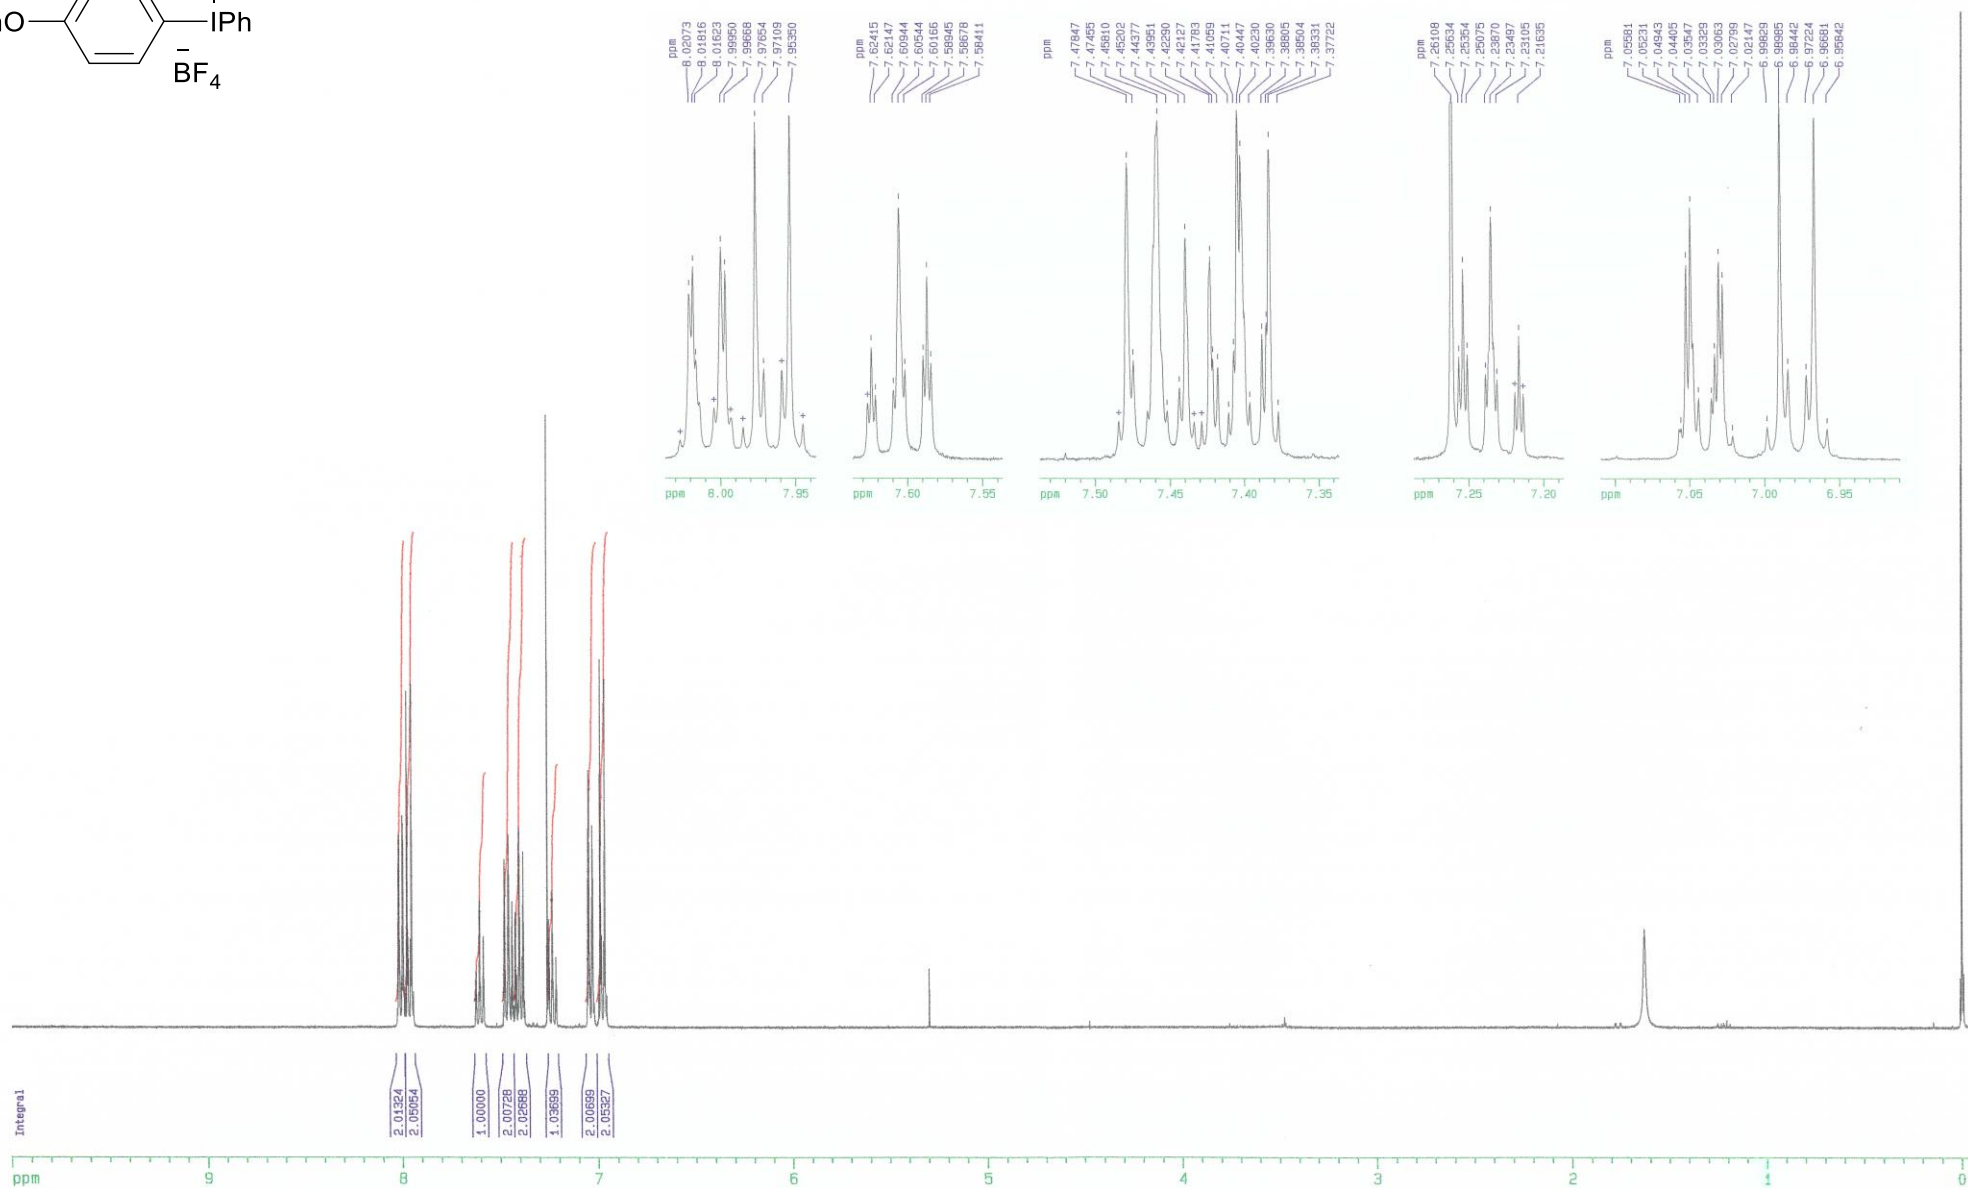

$^{13}\text{C}$  NMR: **3** ( $\text{CDCl}_3$ )

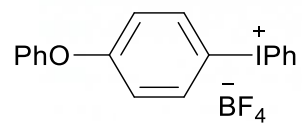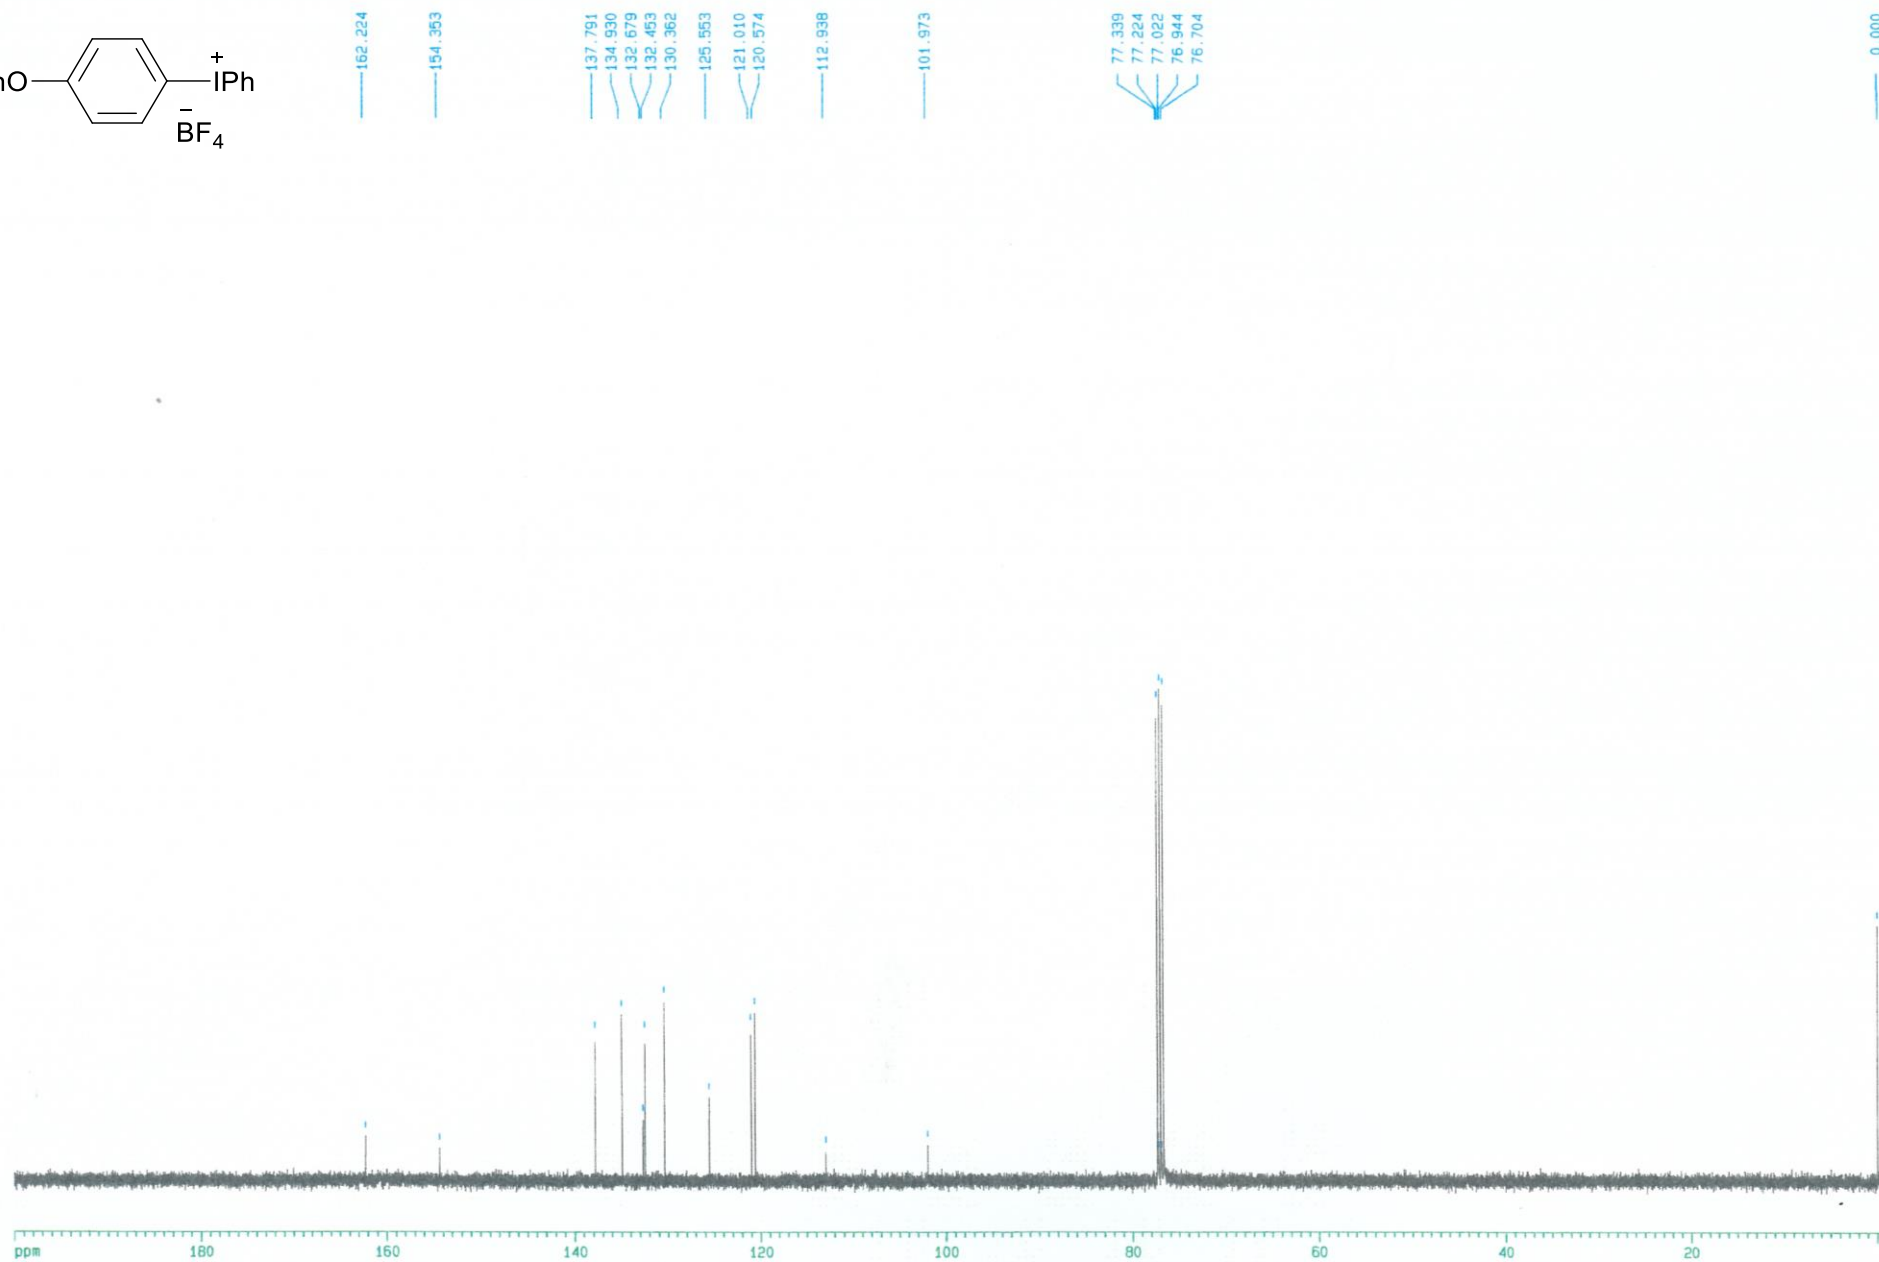

$^1\text{H}$  NMR: **1f** ( $\text{CDCl}_3$ )

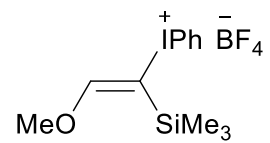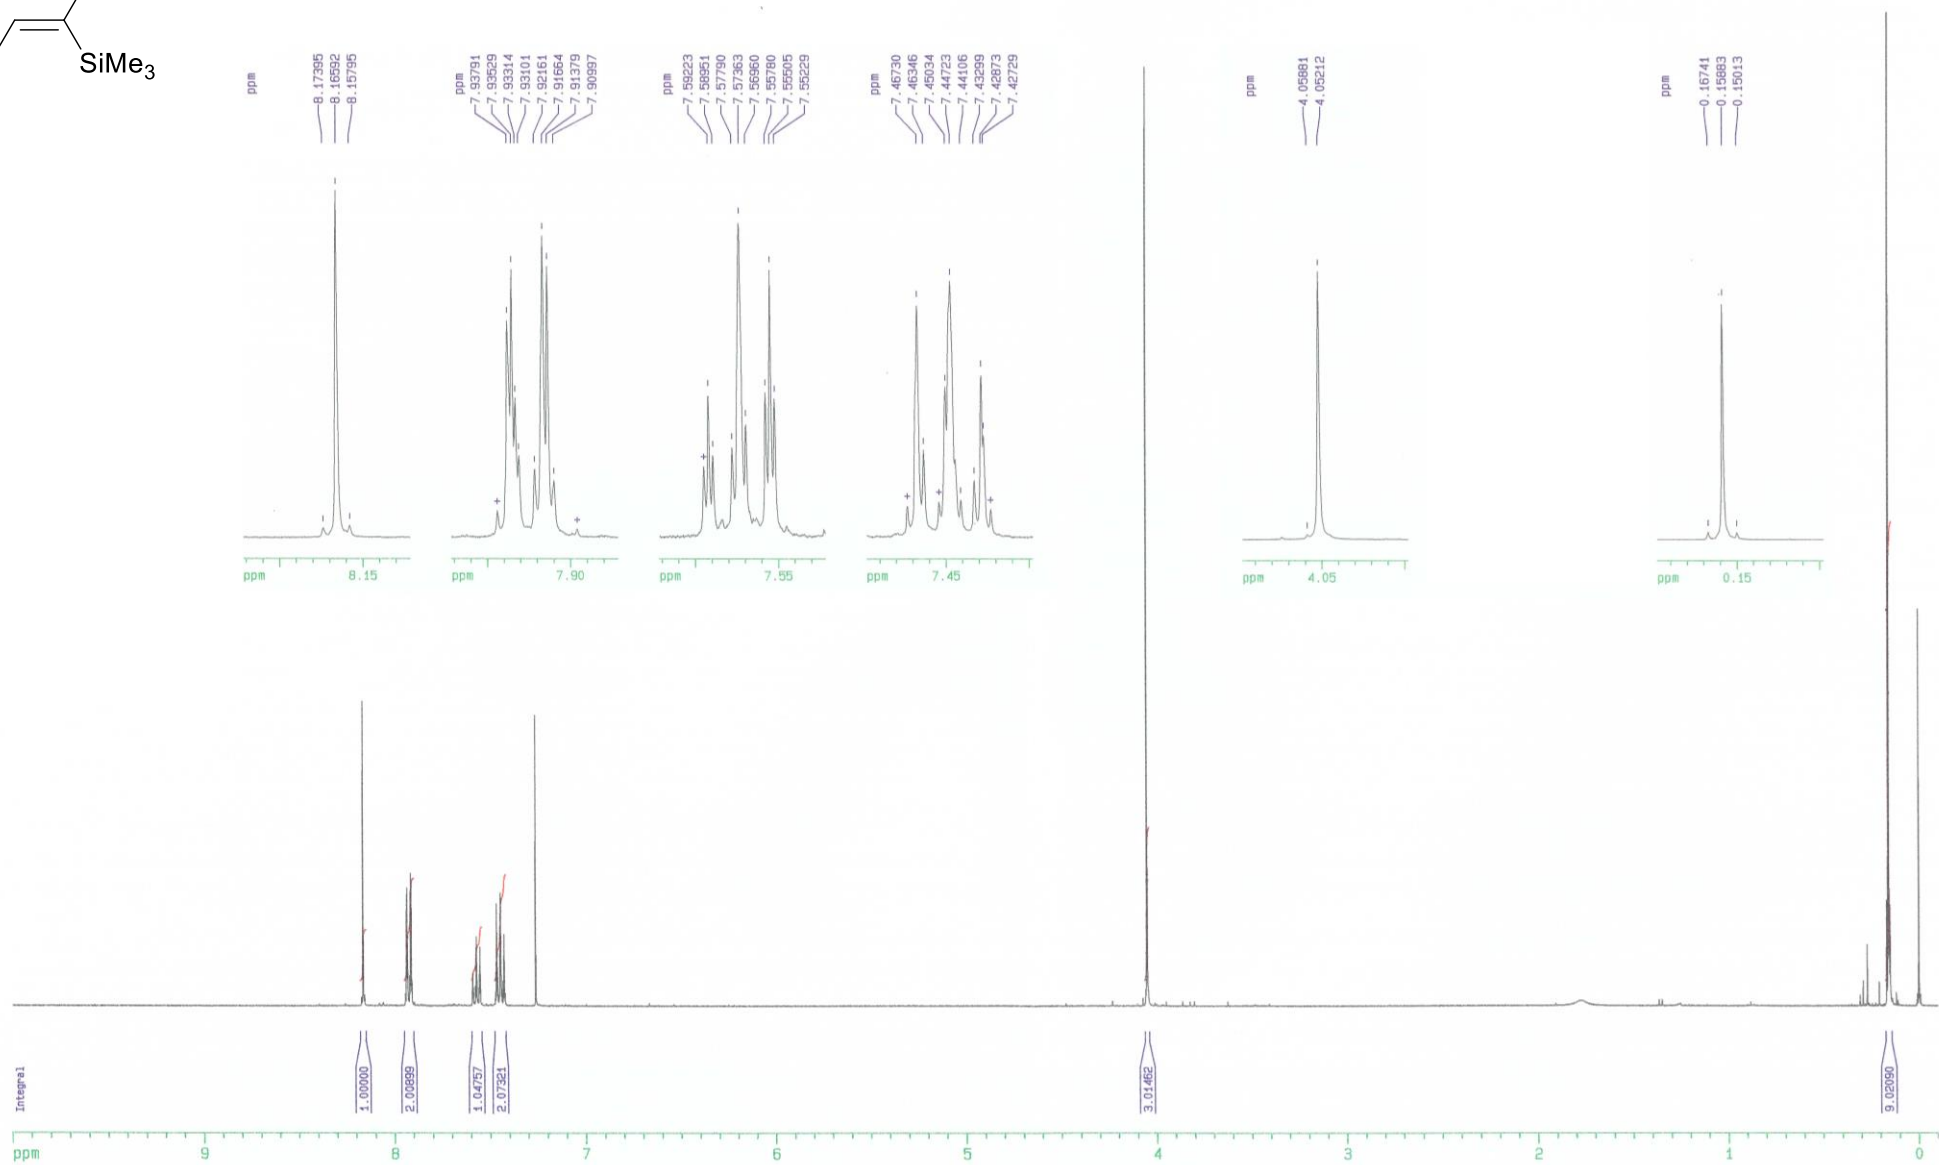

$^{13}\text{C}$  NMR: **1f** ( $\text{CDCl}_3$ )

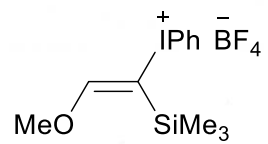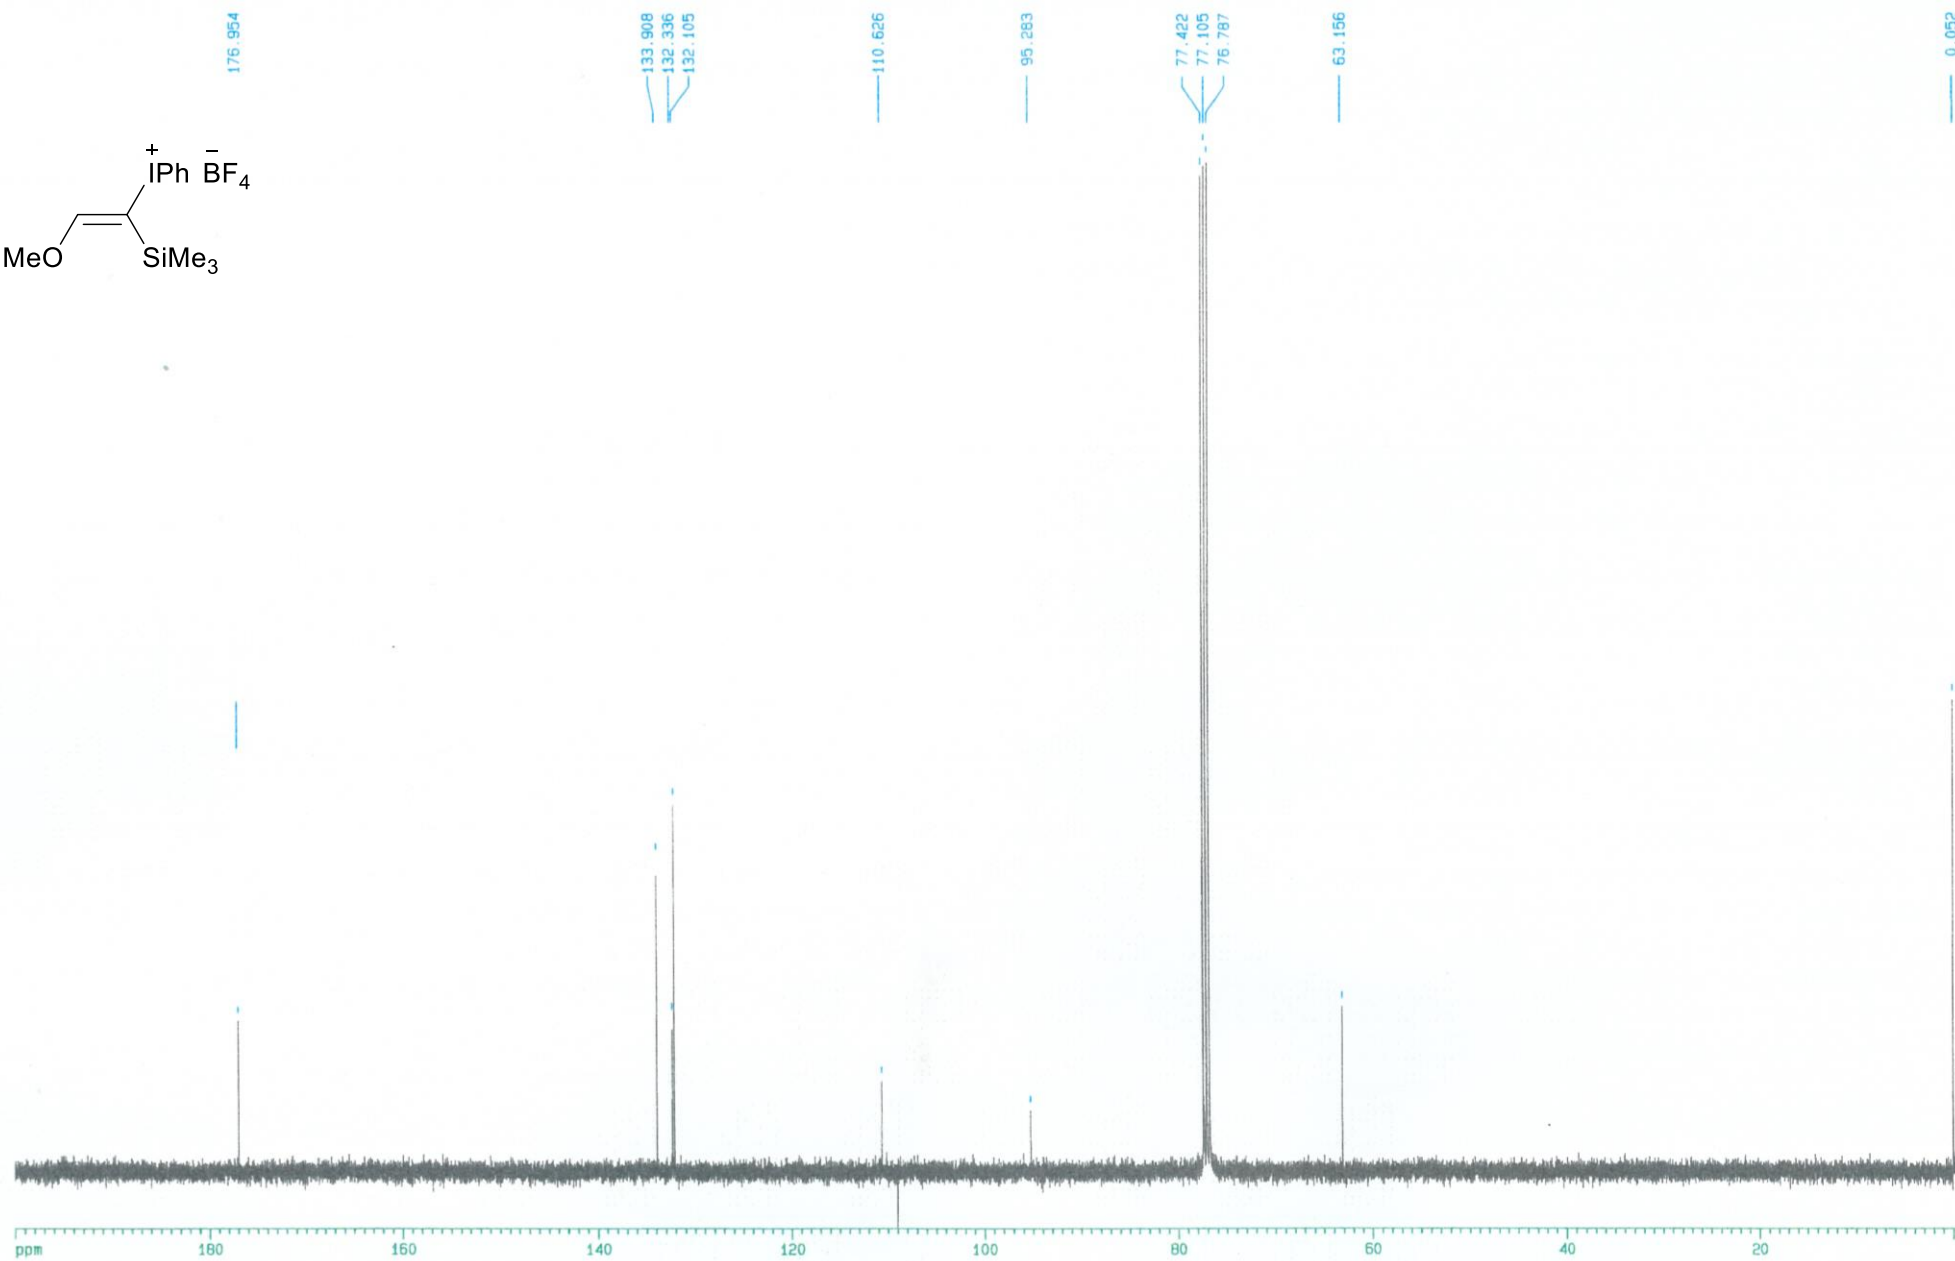

$^1\text{H}$  NMR: **1g** ( $\text{CDCl}_3$ )

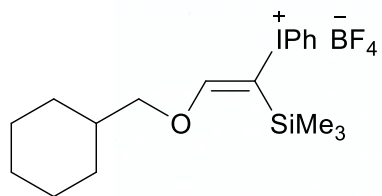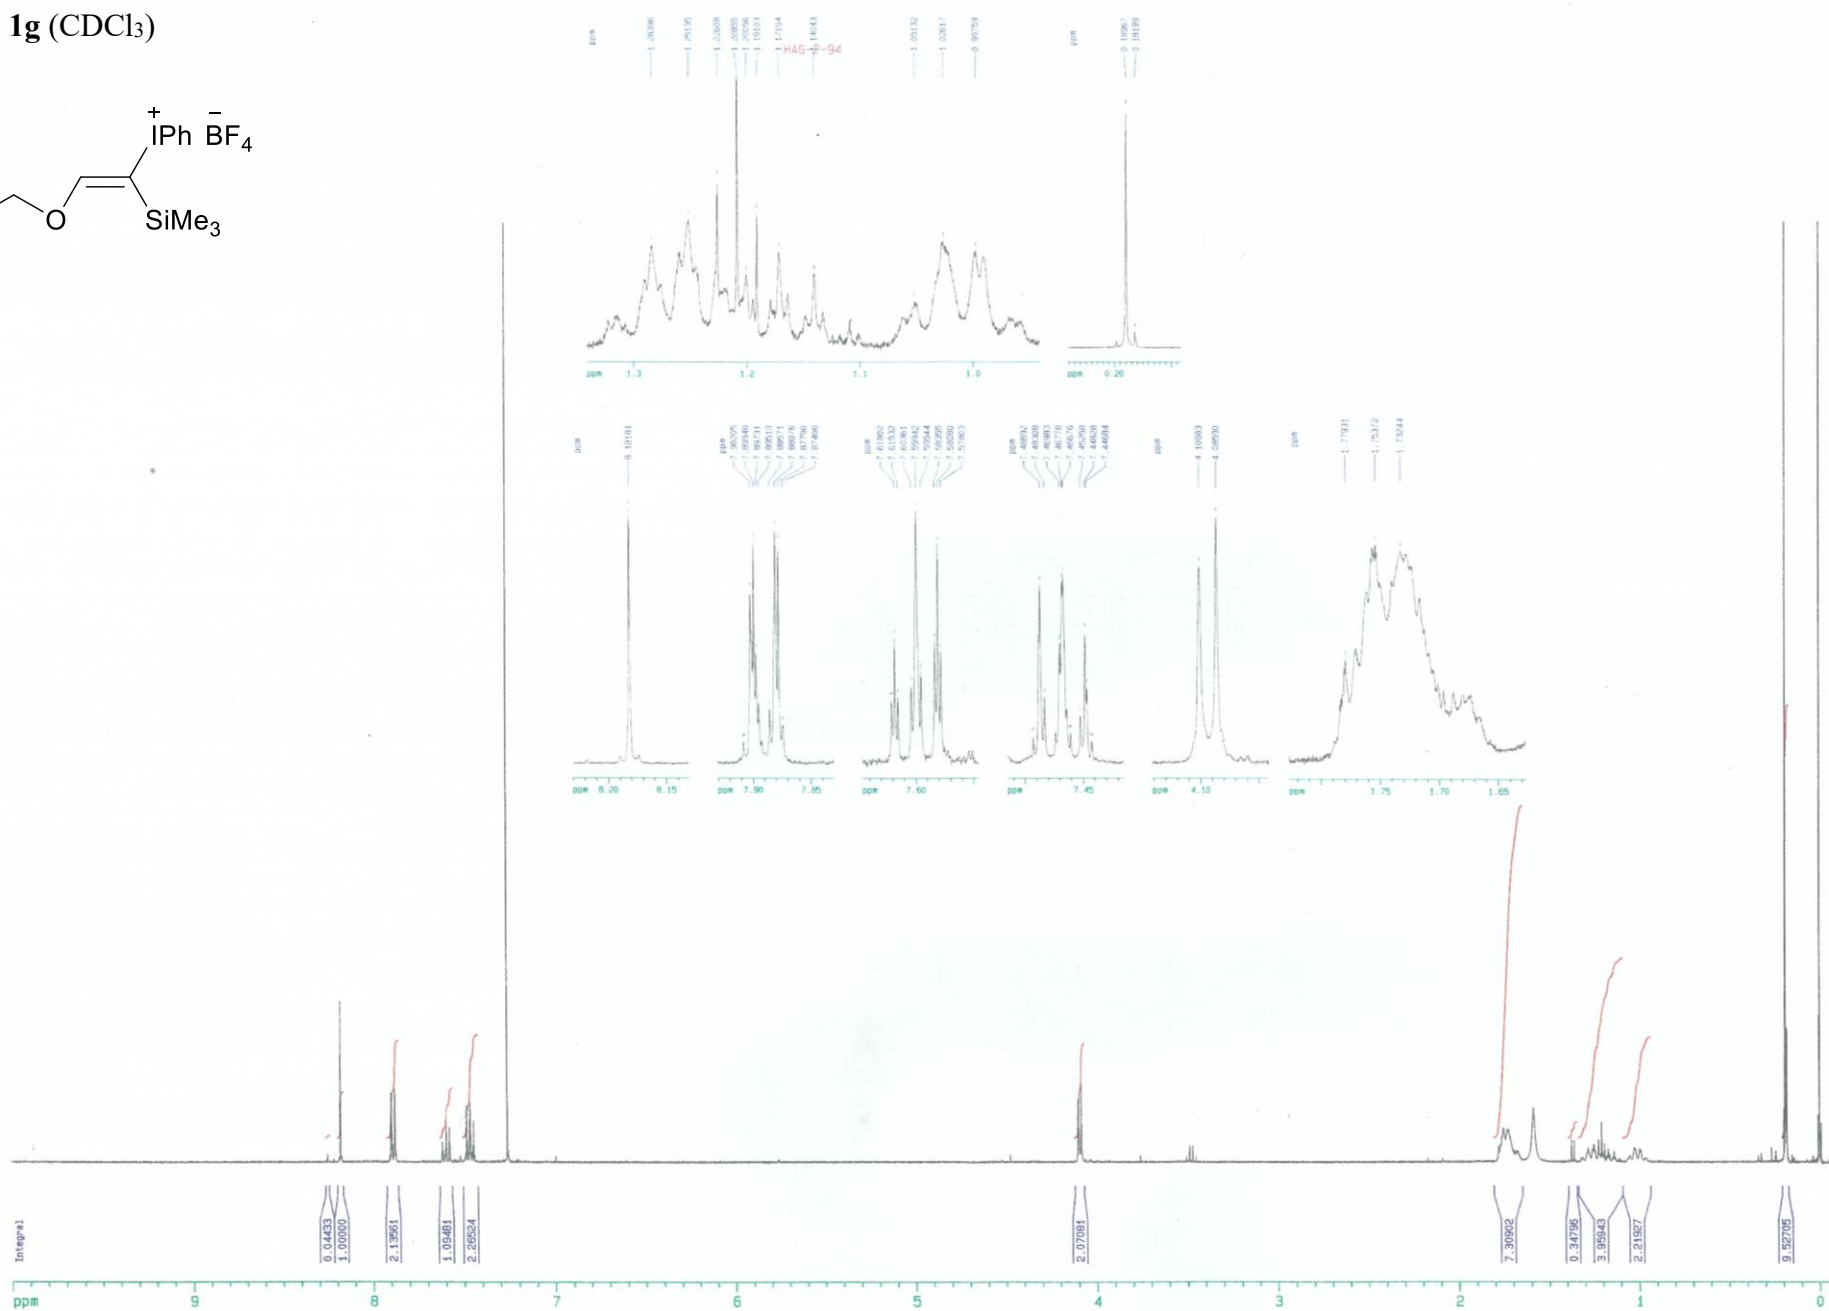

$^{13}\text{C}$  NMR: **1g** ( $\text{CDCl}_3$ )

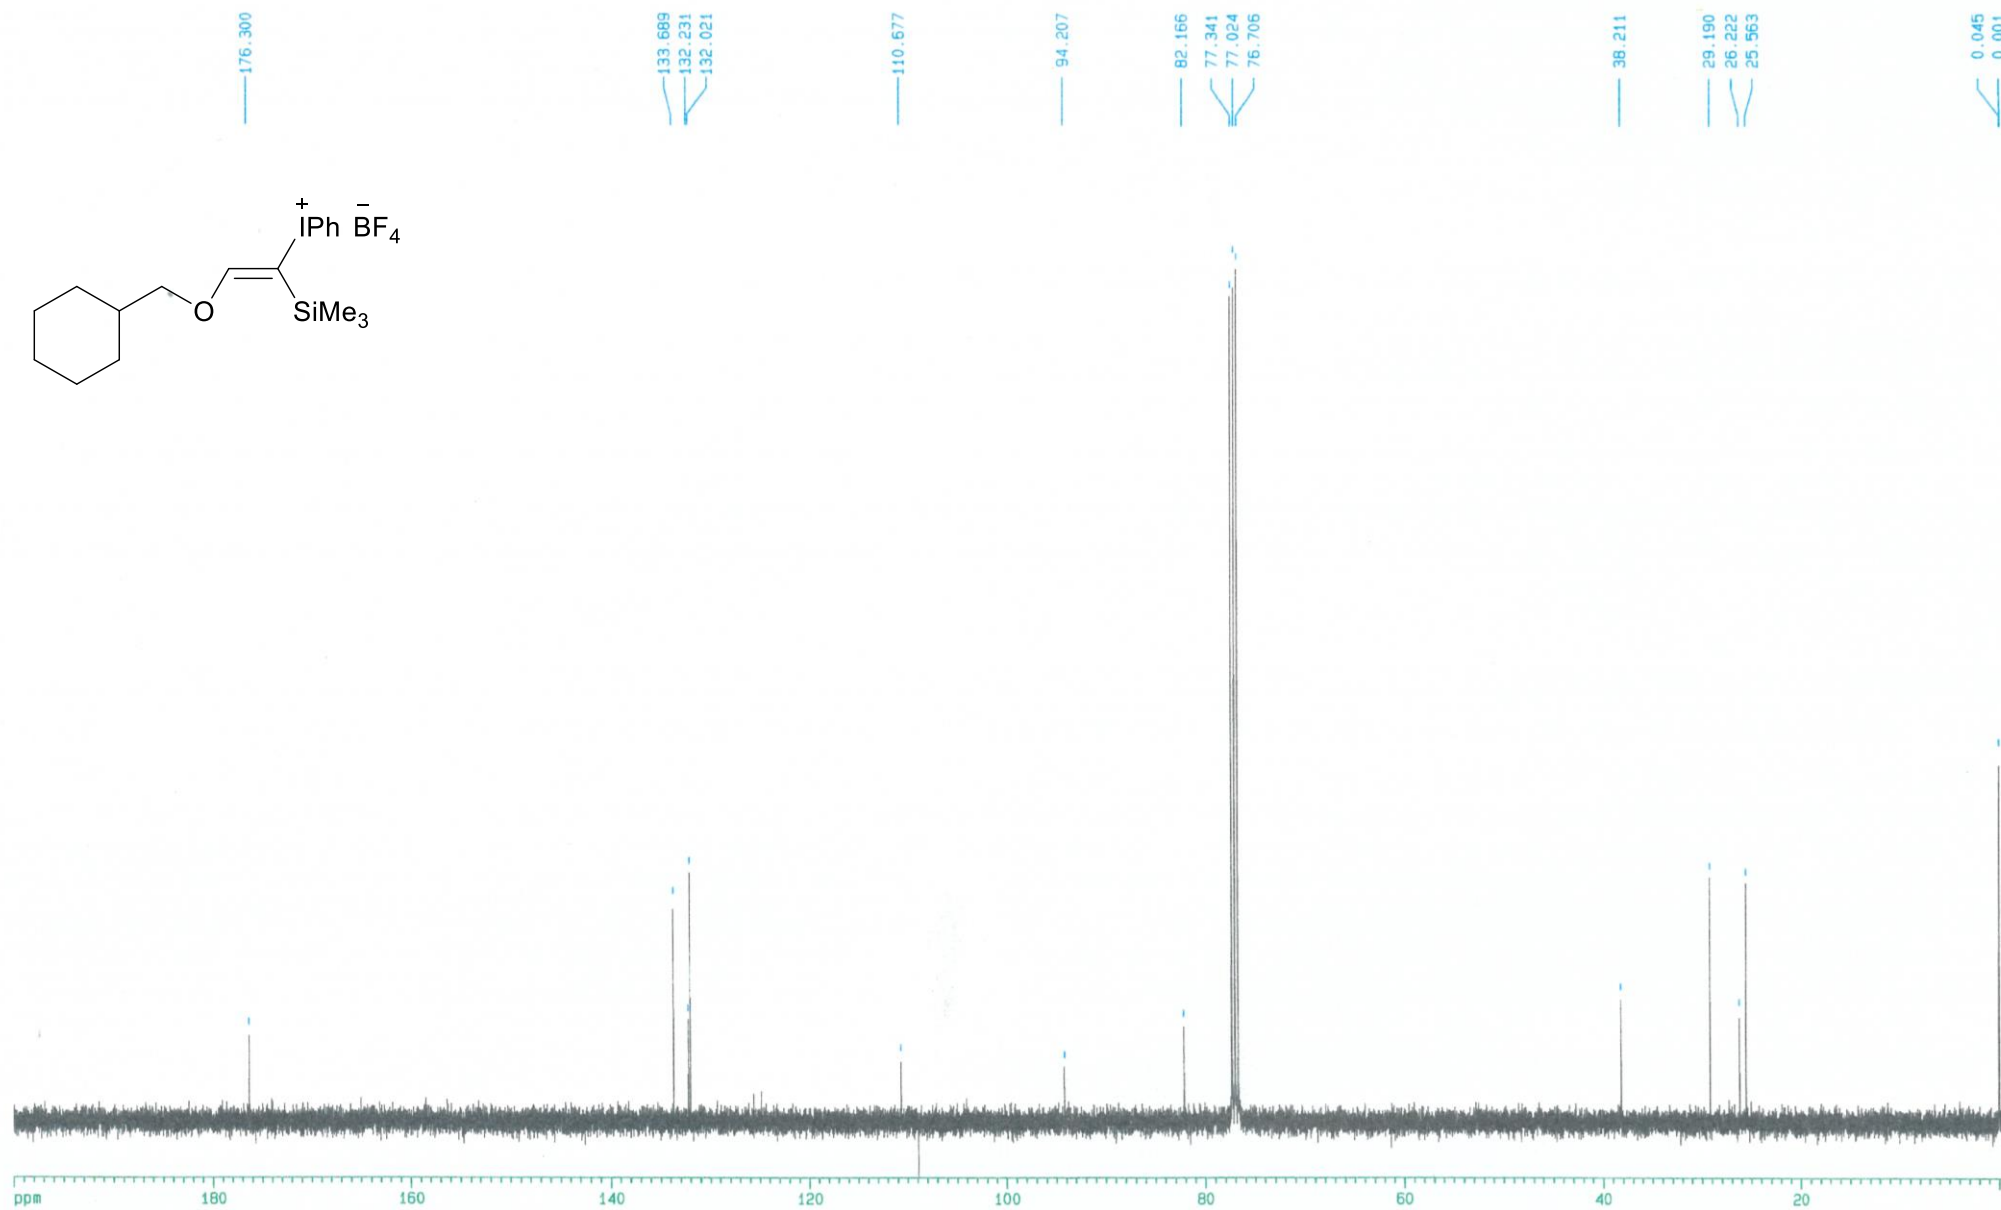

$^1\text{H}$  NMR: **1h** ( $\text{CDCl}_3$ )

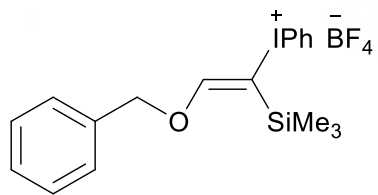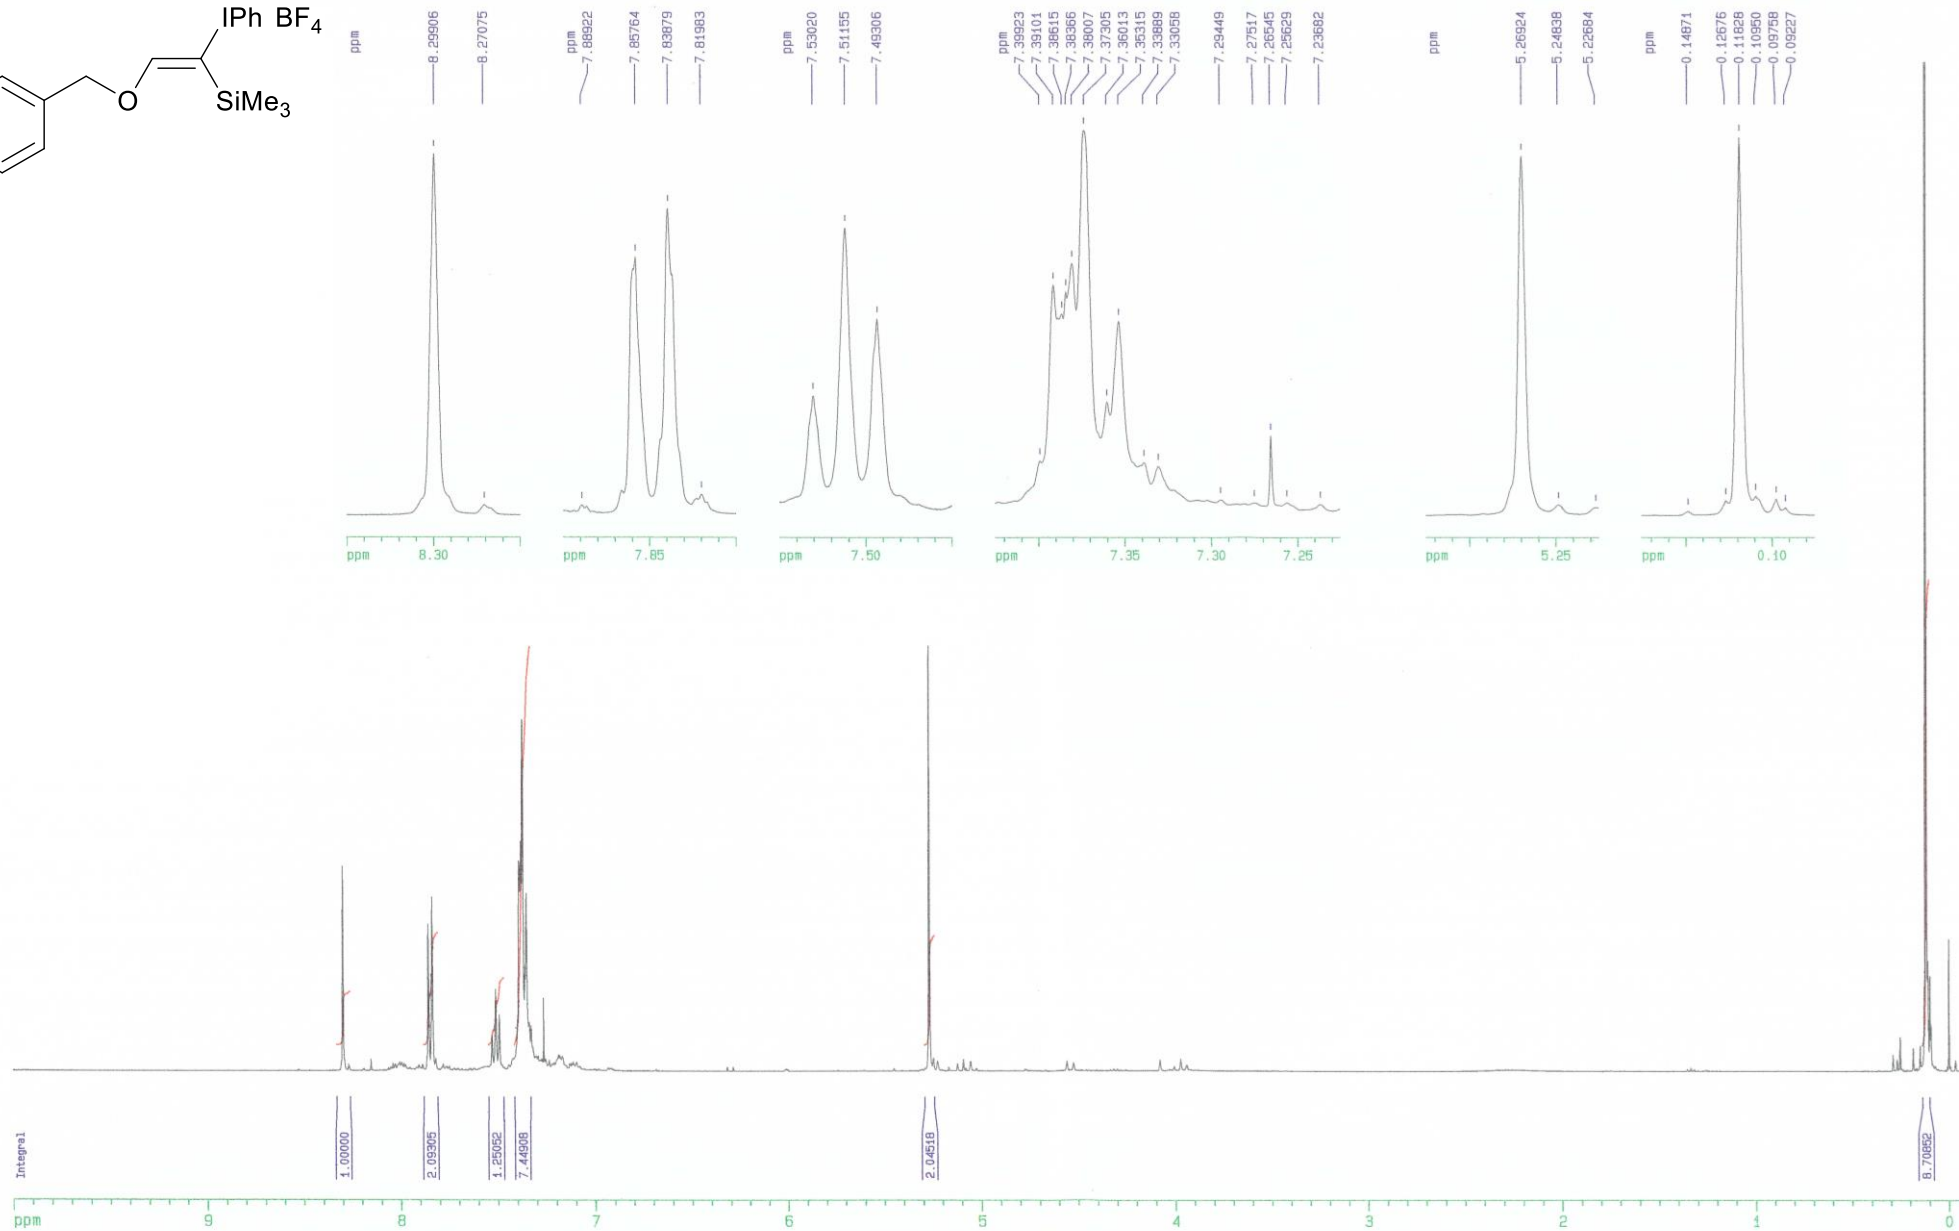

$^{13}\text{C}$  NMR: **1h** ( $\text{CDCl}_3$ )

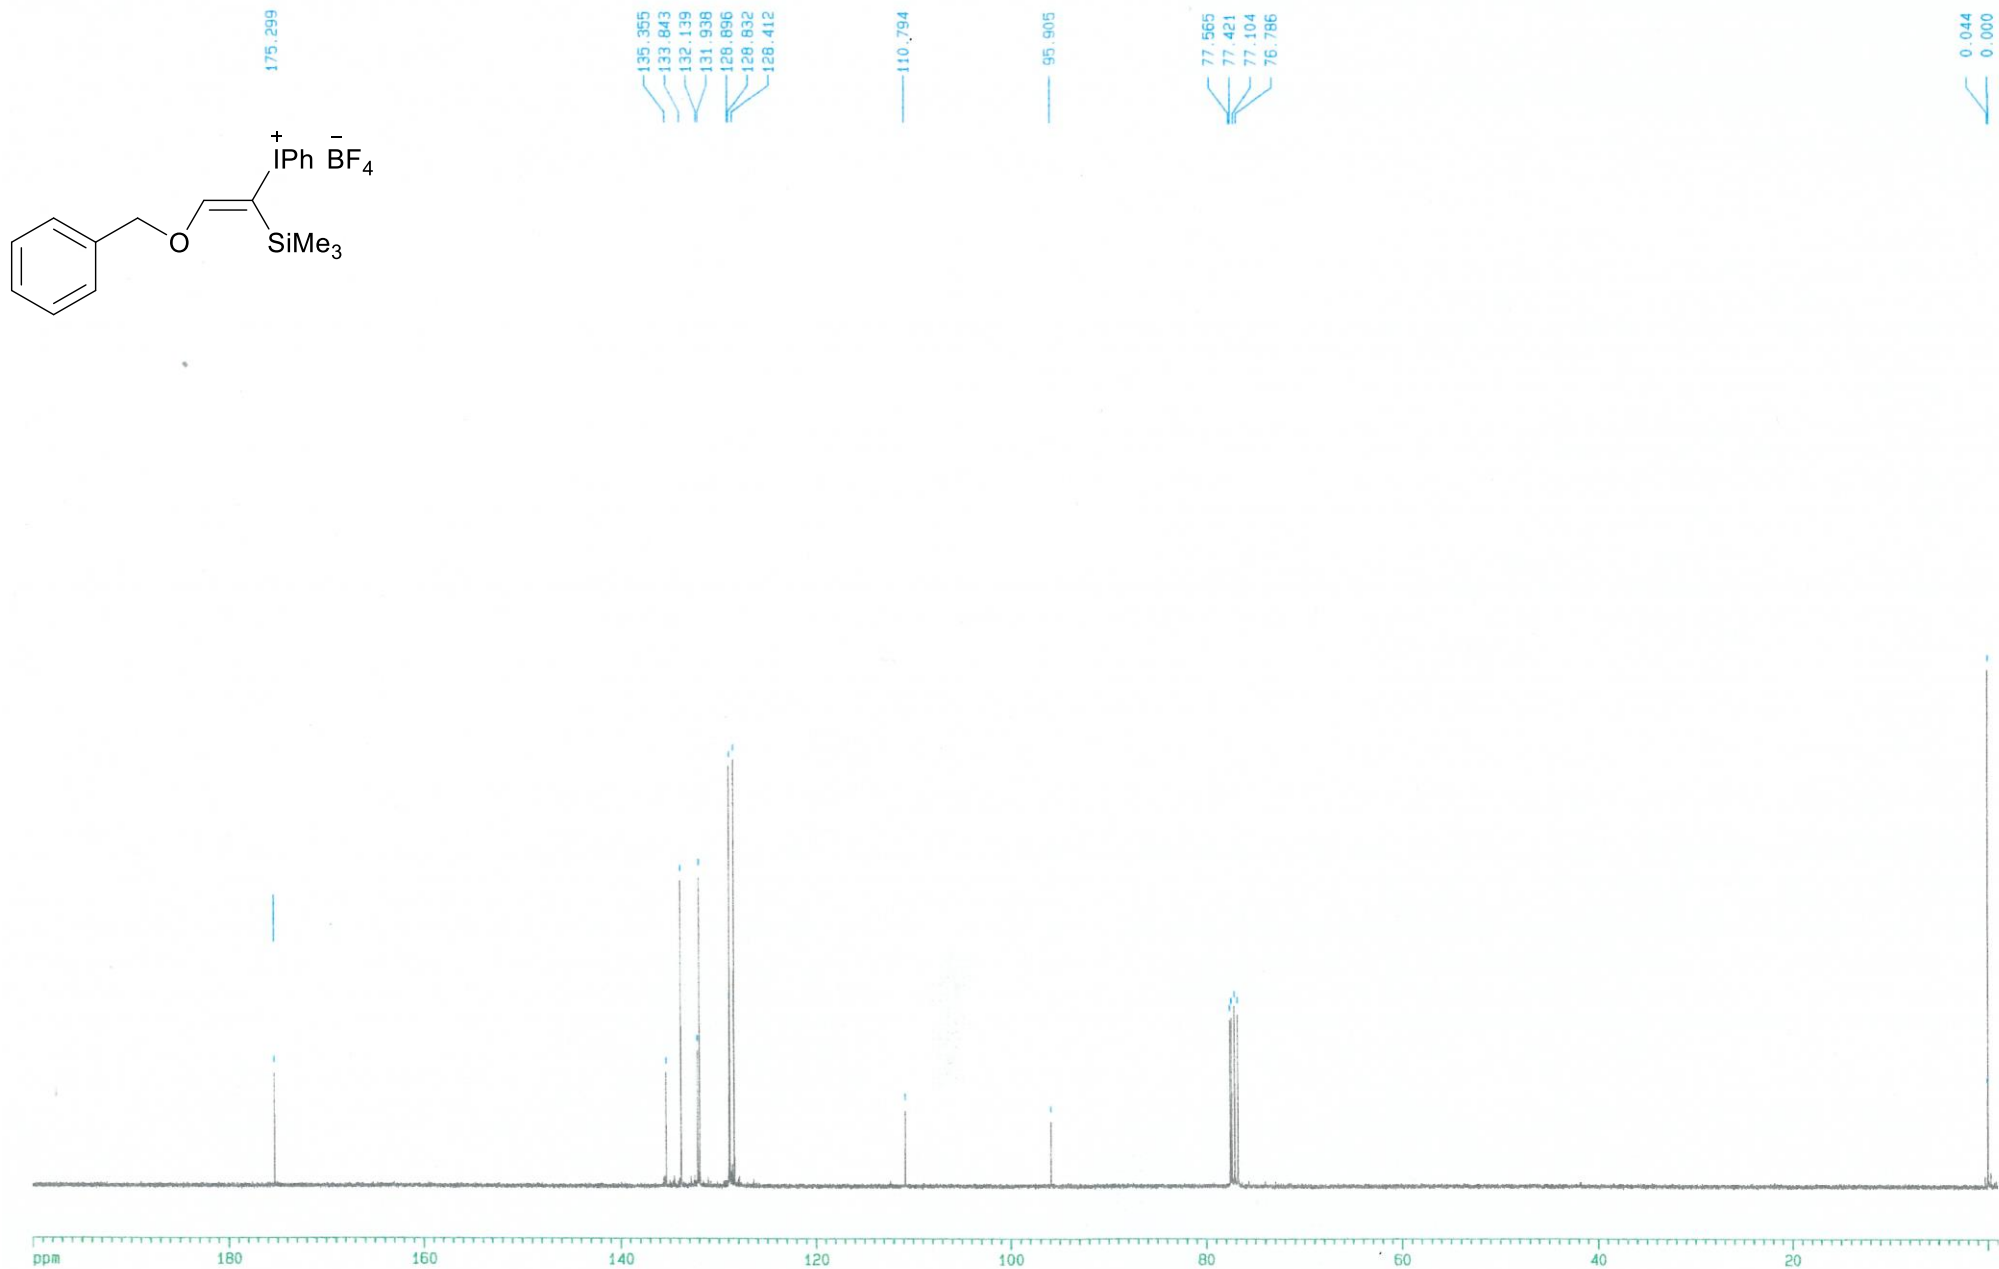

$^1\text{H}$  NMR: **1i** ( $\text{CDCl}_3$ )

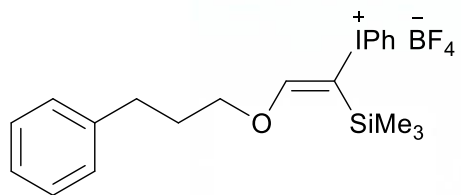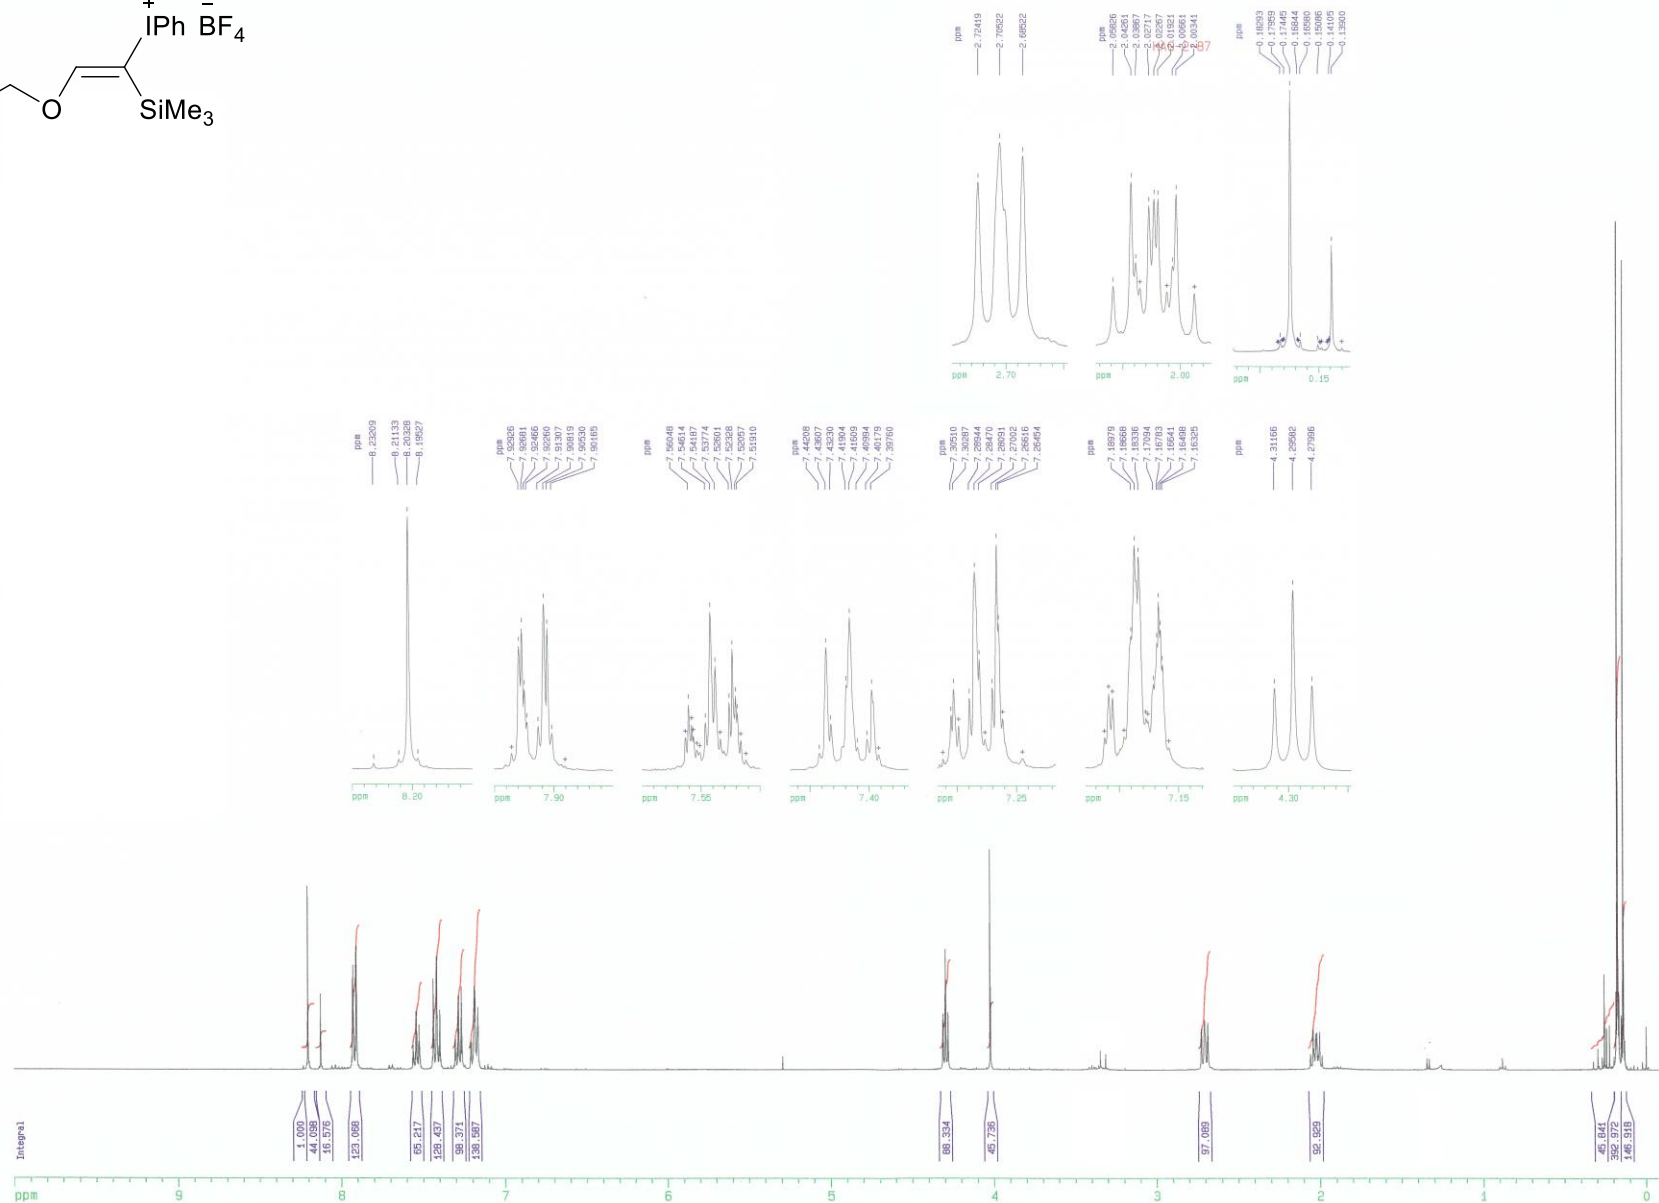

$^{13}\text{C}$  NMR: **1i** ( $\text{CDCl}_3$ )

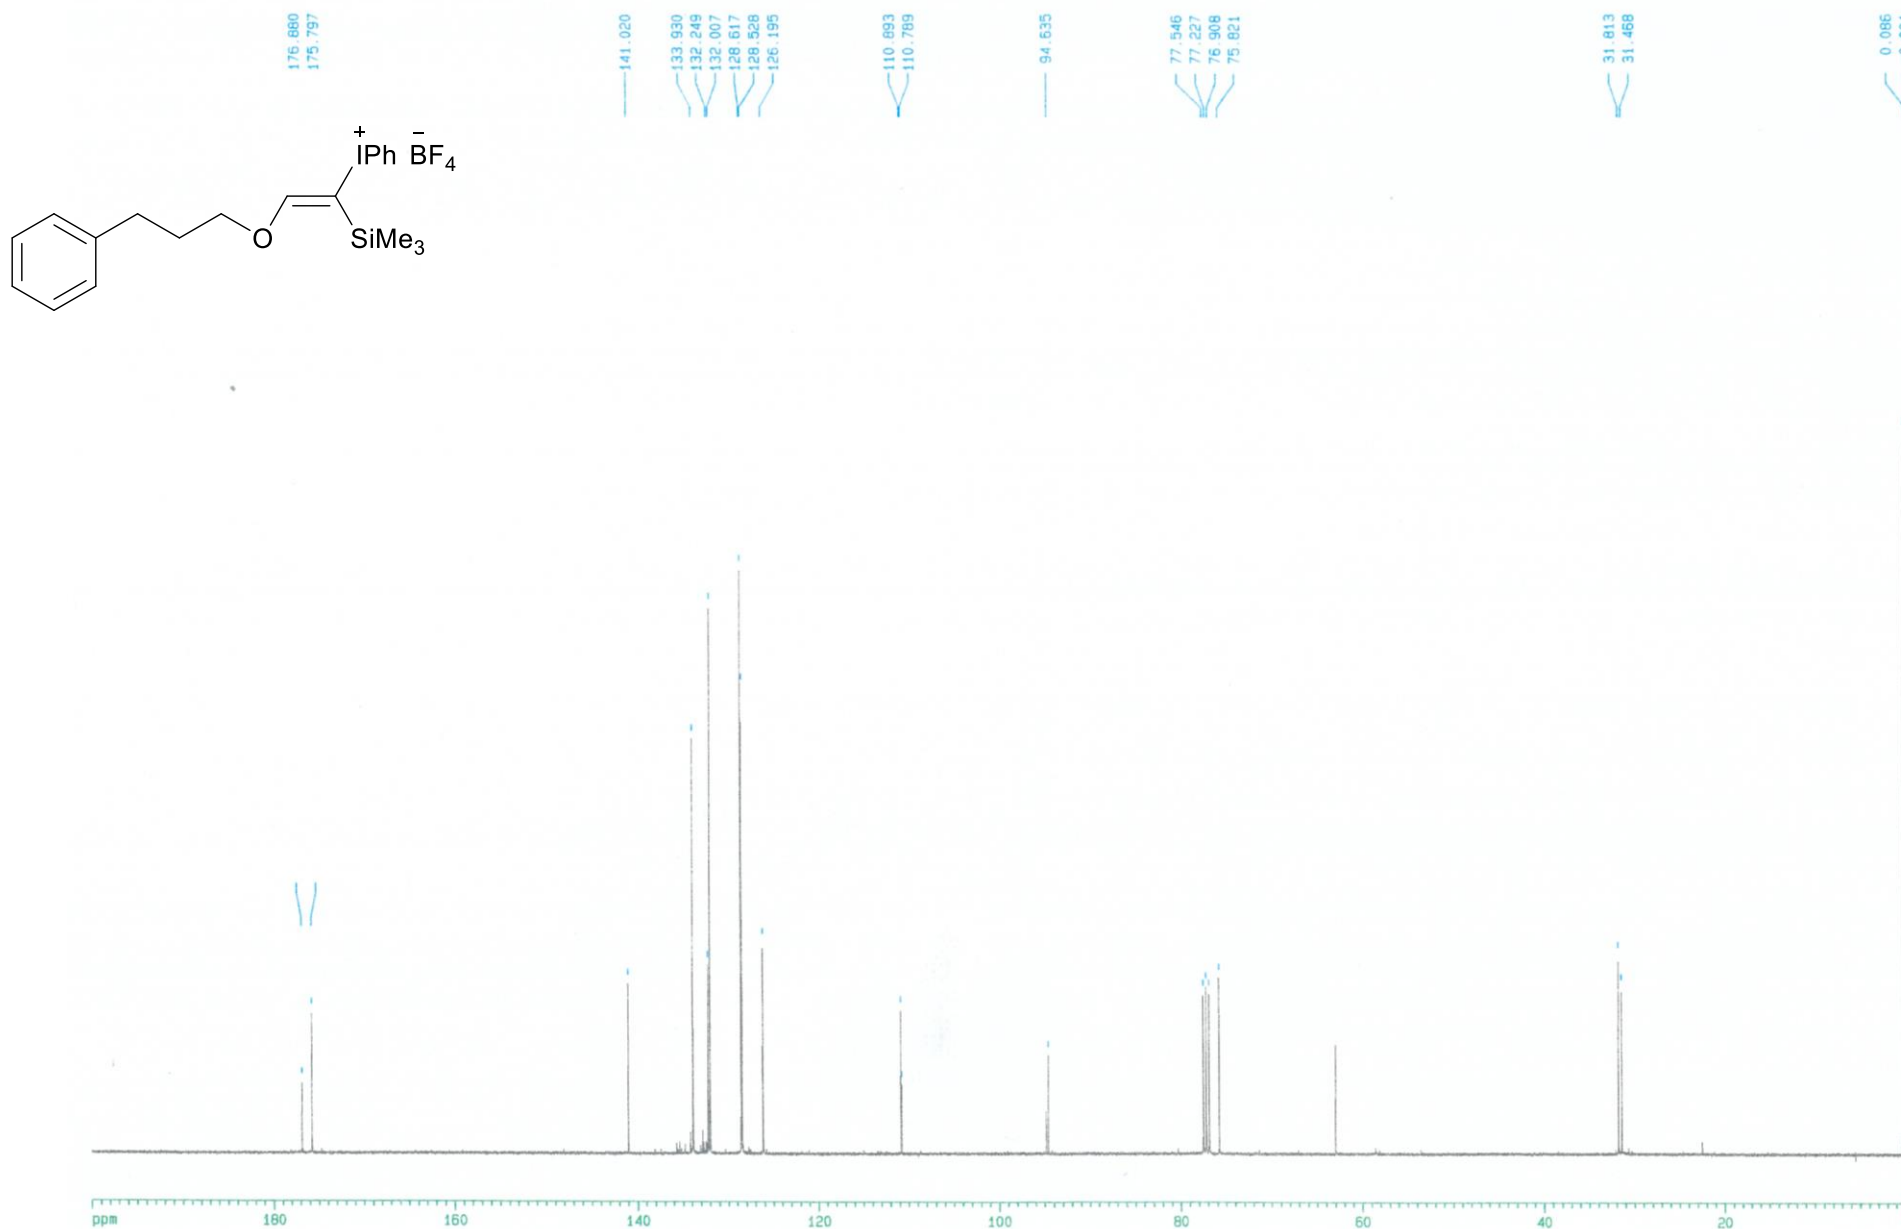

Supplement: d1ob00479d1.pdf [file d1ob00479d1.pdf]
